# Supplementary material for: Cu(ii) immobilized on aminated epichlorohydrin activated silica (CAES): as a new, green and efficient nanocatalyst for preparation of 5-substituted-1H-tetrazoles
Source: Royal Society of Chemistry journal article supplement (doi:10.1039/c4ra15148h), 2015-01-01
Supplement: c4ra15148h1.pdf [file c4ra15148h1.pdf]

## Supplementary Information

### **Cu(II) immobilized on aminated epichlorohydrin activated silica (CAES): as a new, green and efficient nanocatalyst for preparation of 5-substituted-1*H*-tetrazoles**

Nasrin Razavi, Batool Akhlaghinia\*

*Department of Chemistry, Faculty of Sciences, Ferdowsi University of Mashhad, Mashhad  
9177948974, Iran*

#### **Experimental**

##### ***General***

The purity determinations of the products were accomplished by TLC on silica gel polygram STL G/UV 254 plates. The melting points of products were determined with an Electrothermal Type 9100 melting point apparatus. The FT-IR spectra were recorded on an Avatar 370 FT-IR Thermo Nicolet spectrometer. The NMR spectra were provided on Bruker Avance 100 and 400 MHz instruments in acetone-*d*<sub>6</sub>, DMSO-*d*<sub>6</sub> and CD<sub>3</sub>CN. Mass spectra were recorded with Agilent Technologies (HP) 5973 Network Mass Selective Detector and Shimadzu GC-MS-QP5050 instruments at 70 eV. Thermogravimetric analysis (TGA) was performed on a Shimadzu Thermogravimetric Analyzer (TG-50) under air atmosphere. BET surface area and pore size distribution were measured on a Belsorp mini II system at -196 °C using N<sub>2</sub> as adsorbate. Inductively coupled plasma (ICP) was carried out on a Varian, VISTA-PRO, CCD, Australia. All of the products were known compounds and characterized by the FT-IR and comparison of their melting points with known compounds. The structure of selected products was further confirmed by <sup>1</sup>HNMR, <sup>13</sup>CNMR spectroscopy, and mass spectrometry.

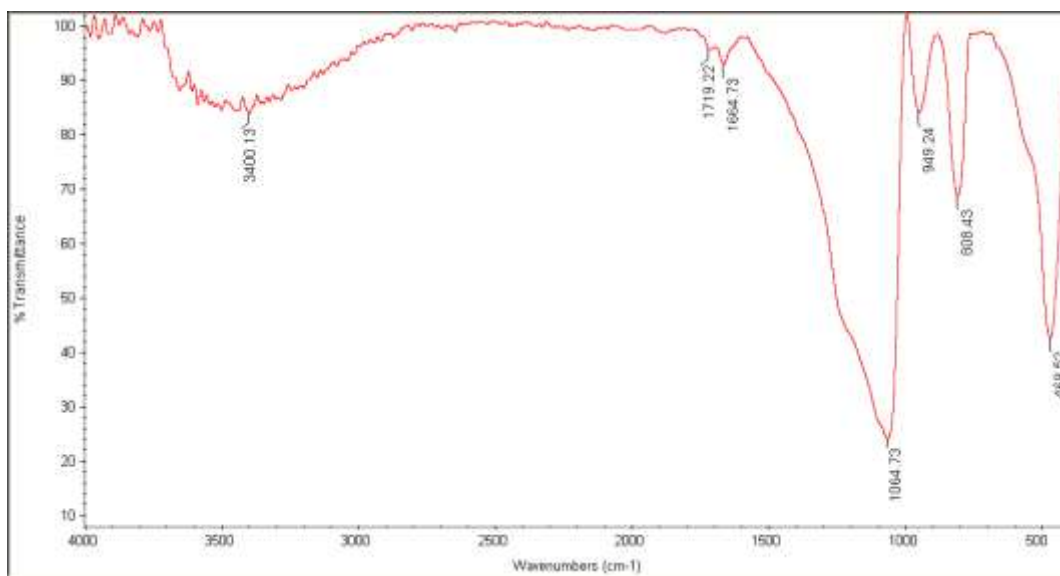

**Figure 1:** FT-IR (KBr) of activated silica with HCl.

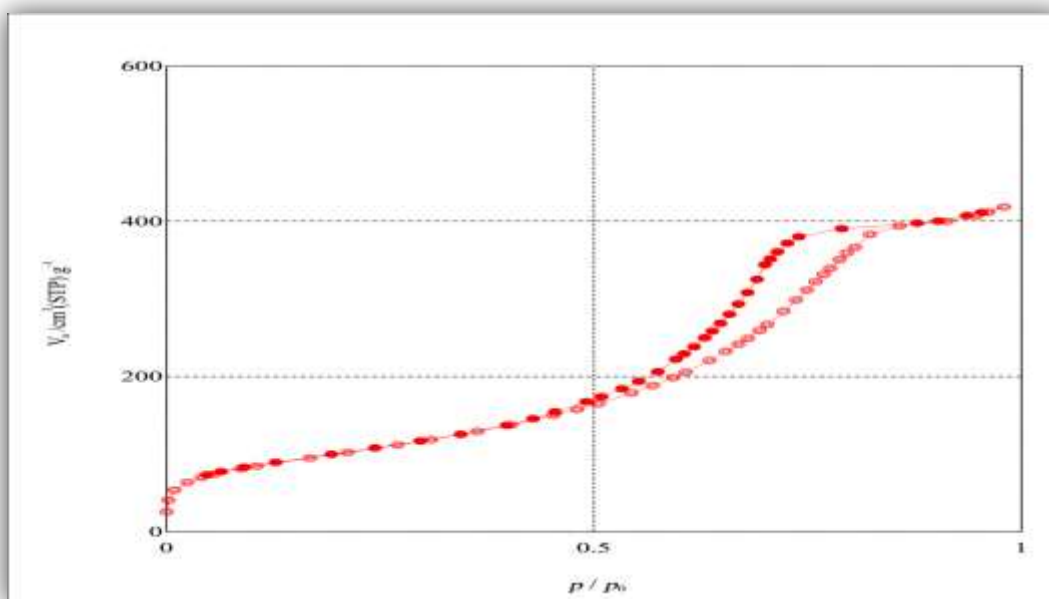

**Figure 2:** Adsorption/desorption isotherm of activated silica with HCl.

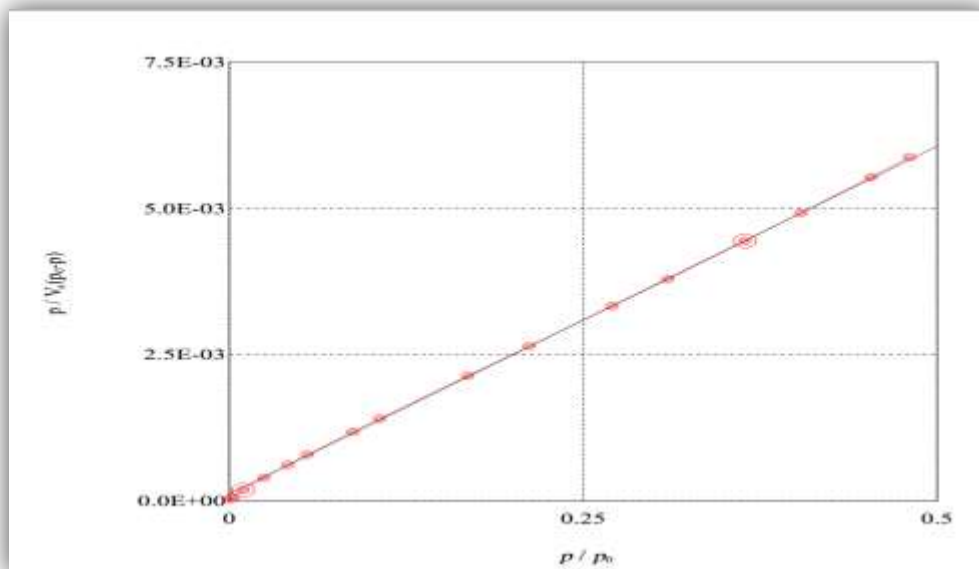

**Figure 3:** BET-Plot of activated silica with HCl.

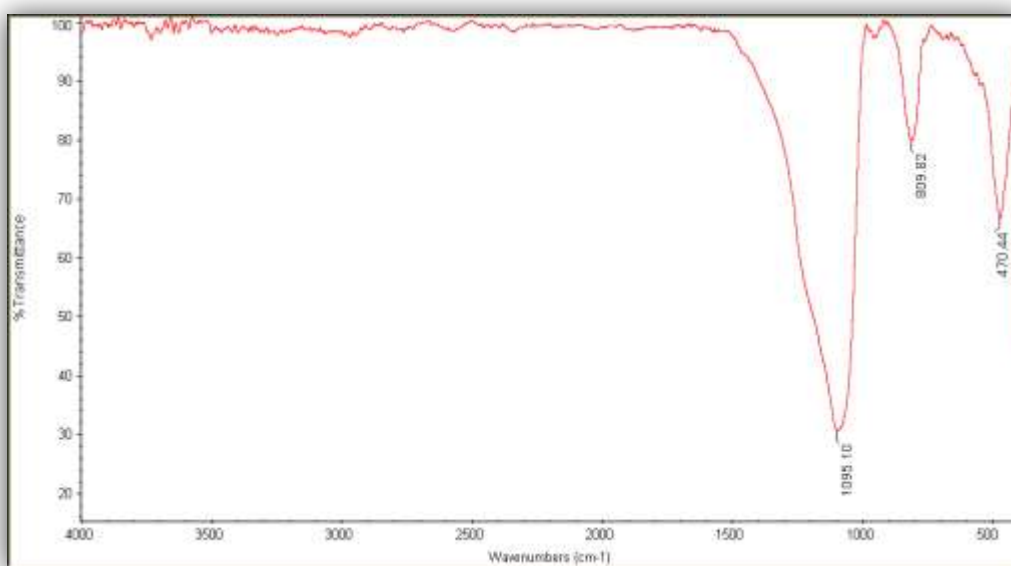

**Figure 4:** FT-IR (KBr) of activated silica with NaOH solution.

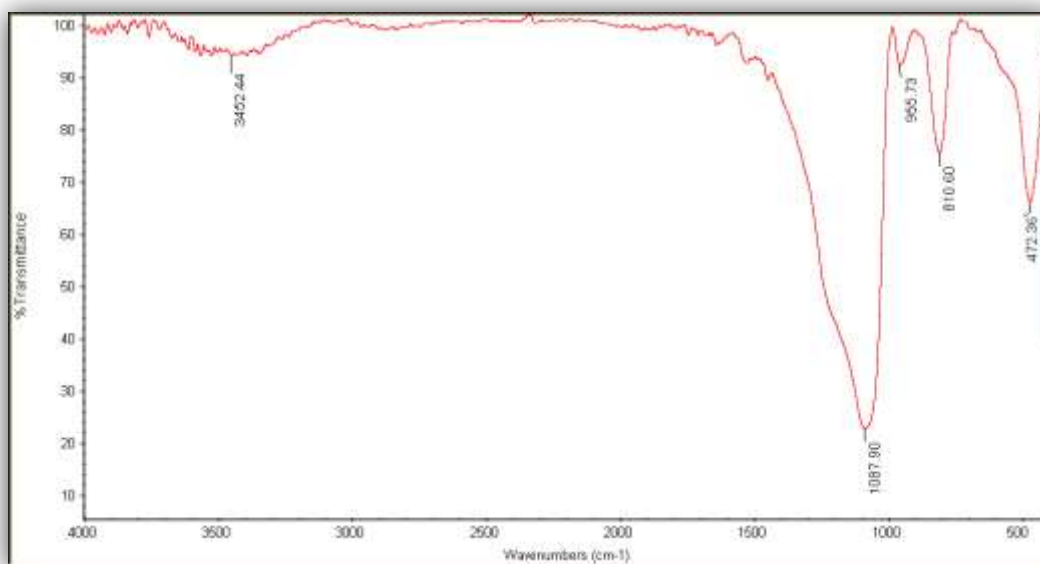

**Figure 5:** FT-IR (KBr) of epichlorohydrin-SiO<sub>2</sub>.

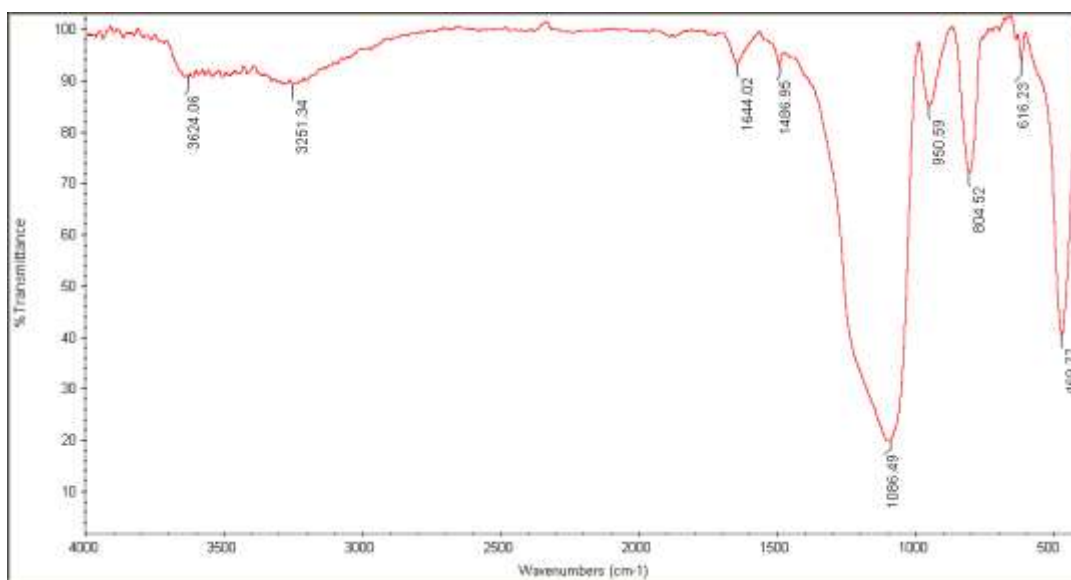

**Figure 6:** FT-IR (KBr) of aminated epichlorohydrin-SiO<sub>2</sub>.

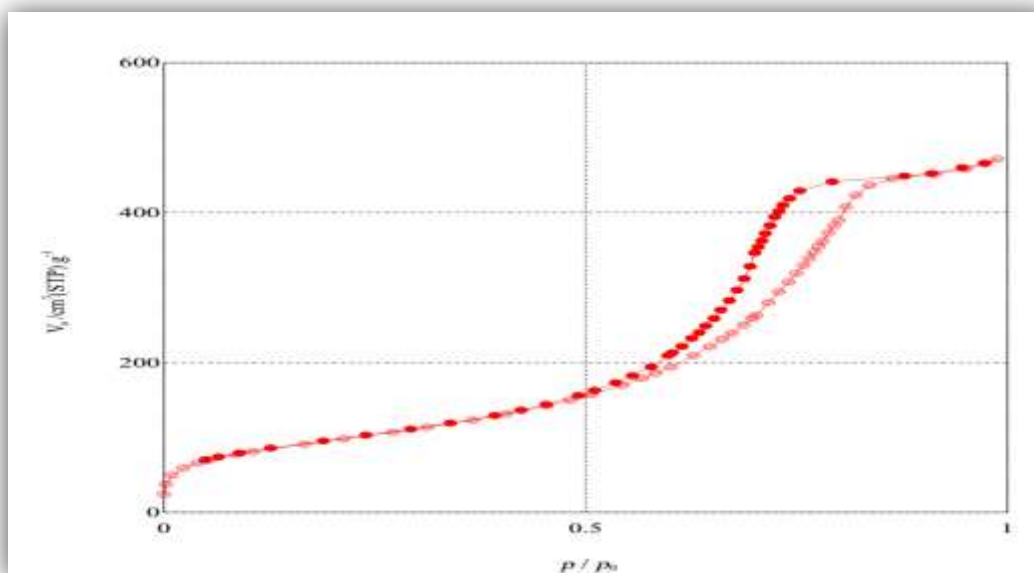

**Figure 7:** Adsorption/desorption isotherm of aminated epichlorohydrin-SiO<sub>2</sub>.

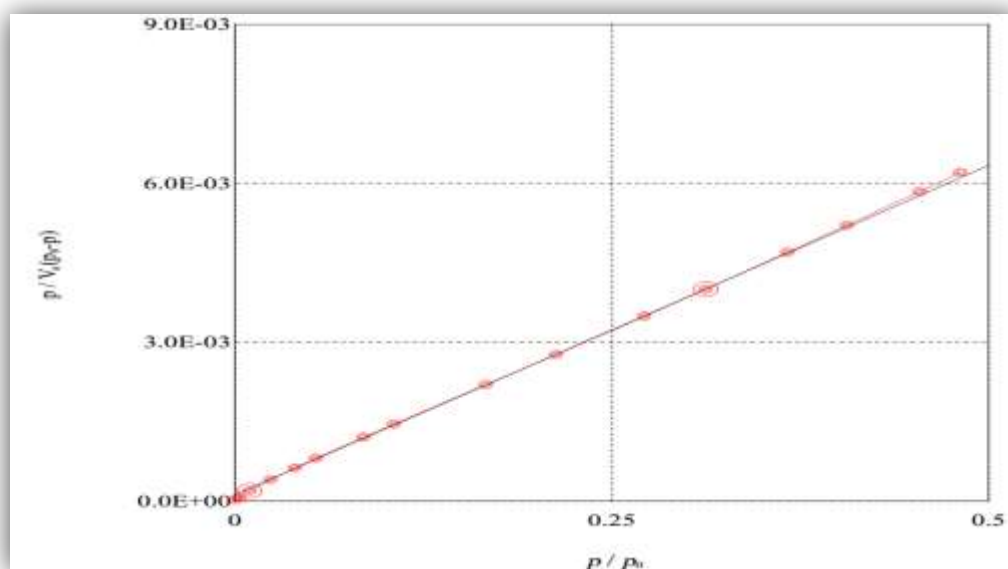

**Figure 8:** BET-Plot of aminated epichlorohydrin-SiO<sub>2</sub>.

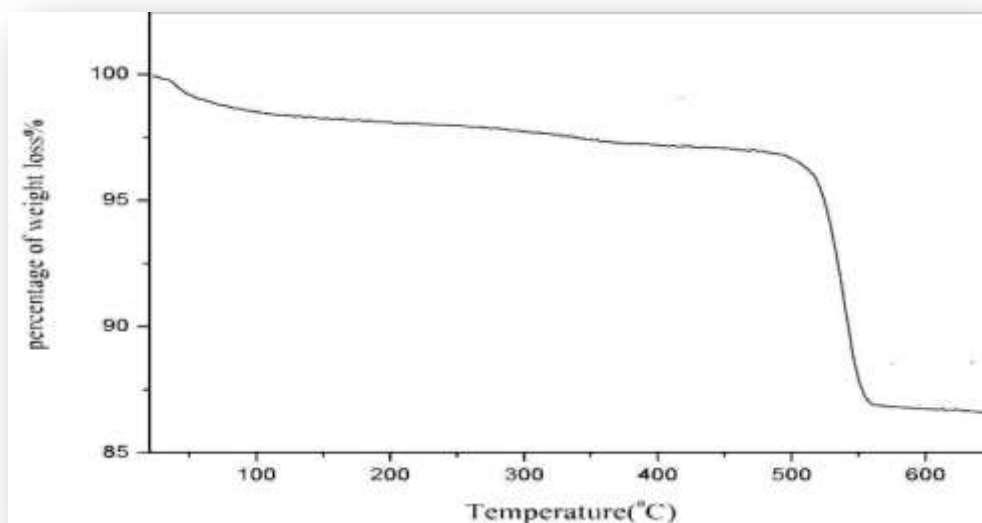

**Figure 9:** Thermogravimetric analysis (TGA) of aminated epichlorohydrin-SiO<sub>2</sub>.

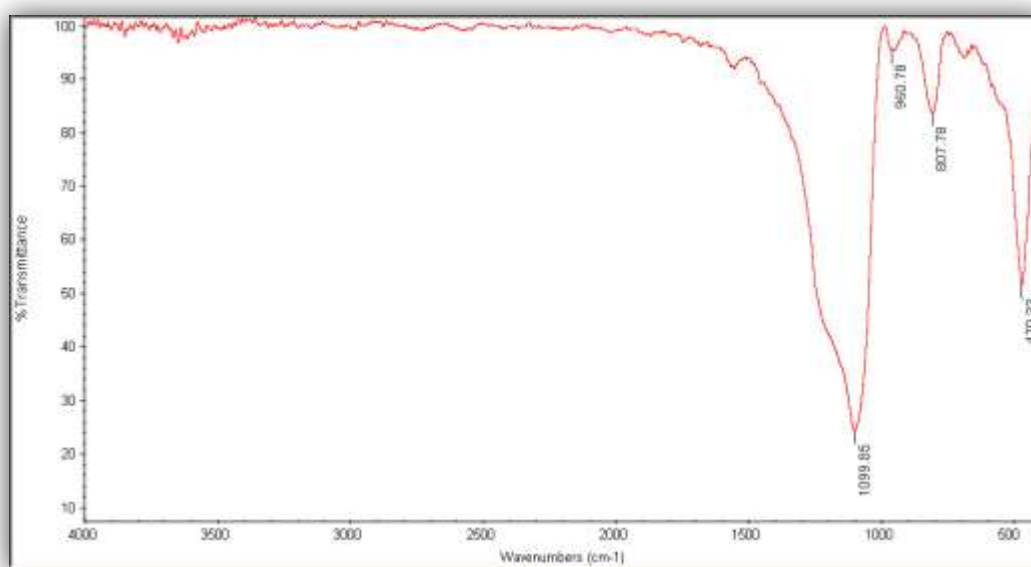

**Figure 10:** FT-IR (KBr) of Cu supported on aminated epichlorohydrin-SiO<sub>2</sub>.

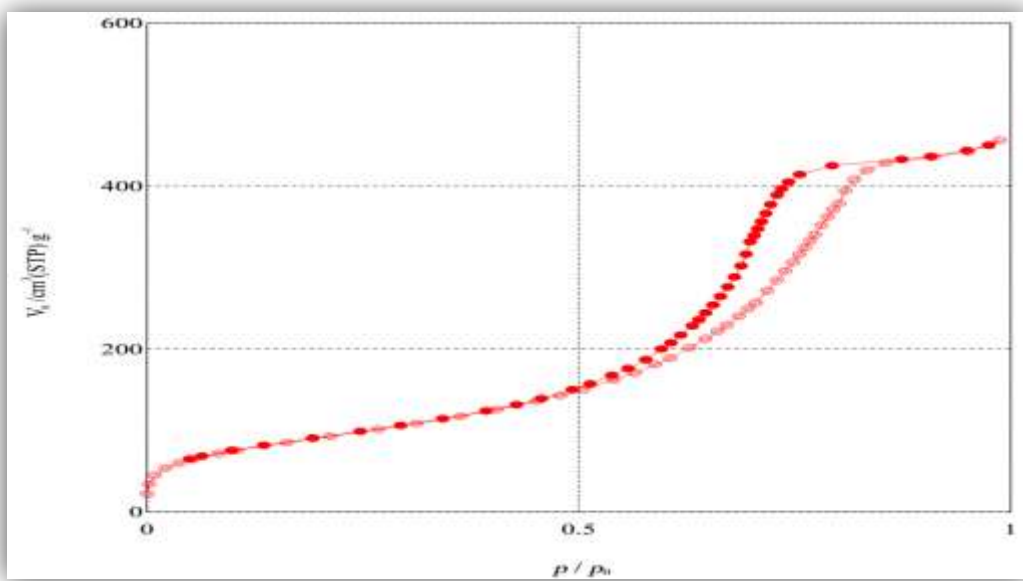

**Figure 11:** Adsorption/desorption isotherm of Cu supported on aminated epichlorohydrin-SiO<sub>2</sub>.

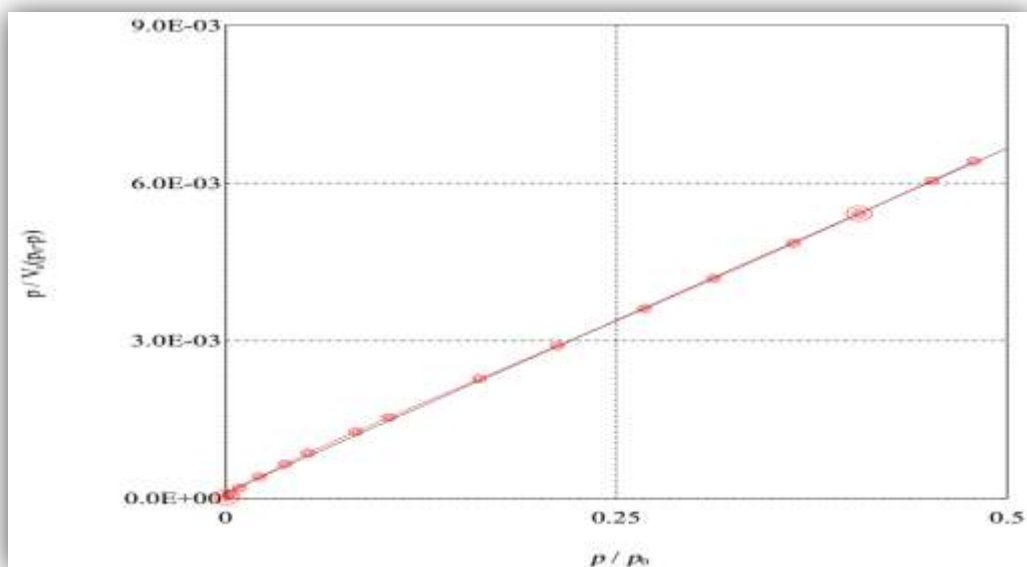

**Figure 12:** BET-Plot of Cu supported on aminated epichlorohydrin-SiO<sub>2</sub>.

| <b>Sample (Samp)</b> |          | <b>12/31/2014, 9:12:09 AM</b> |       |         |      | <b>Tube 61</b> |            |
|----------------------|----------|-------------------------------|-------|---------|------|----------------|------------|
| Weight: 0.0617       |          | Volume: 25                    |       |         |      | Dilution: 1    |            |
| El                   | Wavelen. | Sol'n Conc.                   | Units | SD      | %RSD | Int. (c/s)     | Calc Conc. |
| Cu                   | 324.754  | 39.716                        | ppm   | 0.21826 | 0.5  | 104924         | 16092 ppm  |

**Figure 13:** ICP of Cu supported on aminated epichlorohydrin-SiO<sub>2</sub>.

| <b>Cu (Samp)</b> |          | <b>2/21/2015, 5:33:15 AM</b> |       |          |      | <b>Tube 33</b> |            |
|------------------|----------|------------------------------|-------|----------|------|----------------|------------|
| Weight: 0.0444   |          | Volume: 20                   |       |          |      | Dilution: 5    |            |
| El               | Wavelen. | Sol'n Conc.                  | Units | SD       | %RSD | Int. (c/s)     | Calc Conc. |
| Cu               | 324.754  | 4.6406                       | ppm   | 0.016139 | 0.3  | 11199          | 12452 ppm  |

**Figure 14:** ICP of fifth reused Cu supported on aminated epichlorohydrin-SiO<sub>2</sub>.



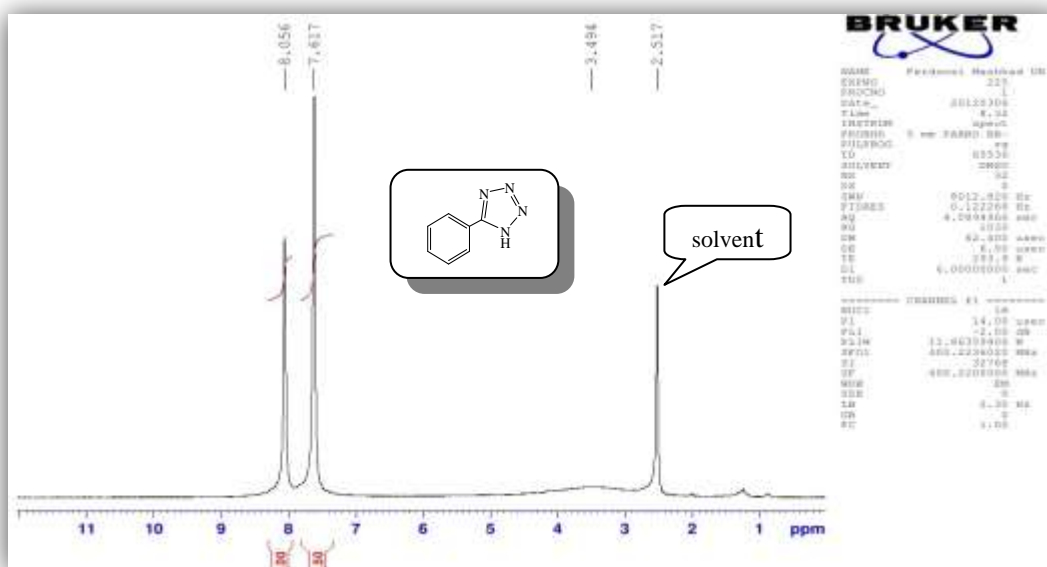

**Figure 15:**  $^1\text{H}$  NMR (400 MHz,  $\text{DMSO-d}_6$ ) of 5-Phenyl-1H-tetrazole (Table 2, entry 1).

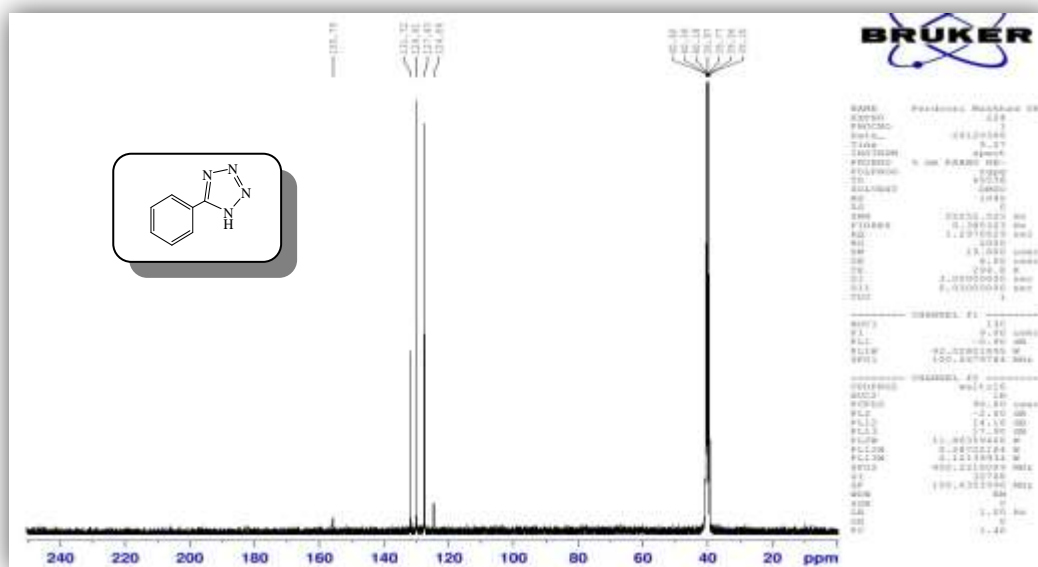

**Figure 16:**  $^{13}\text{C}$  NMR (100 MHz,  $\text{DMSO-d}_6$ ) of 5-Phenyl-1H-tetrazole (Table 2, entry 1).

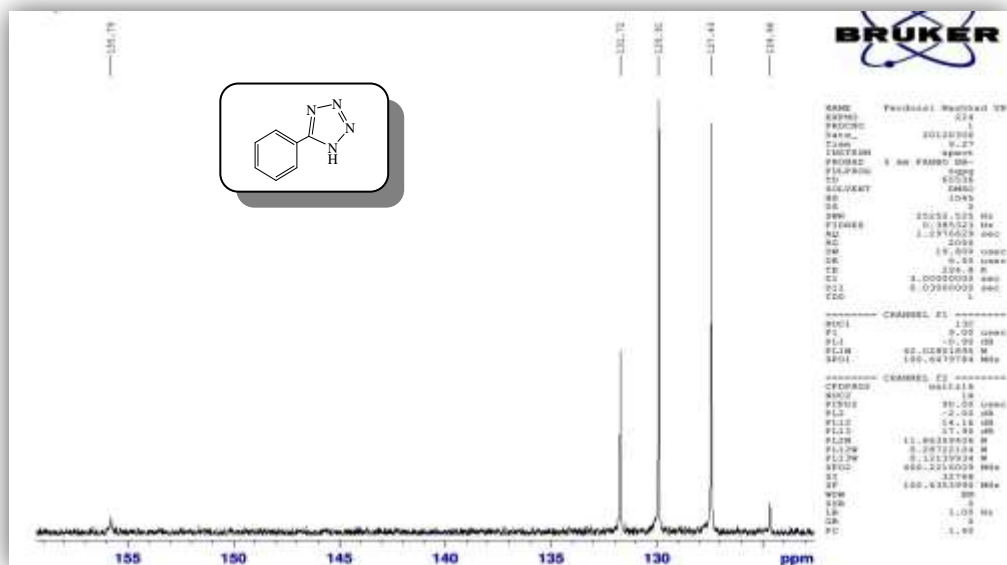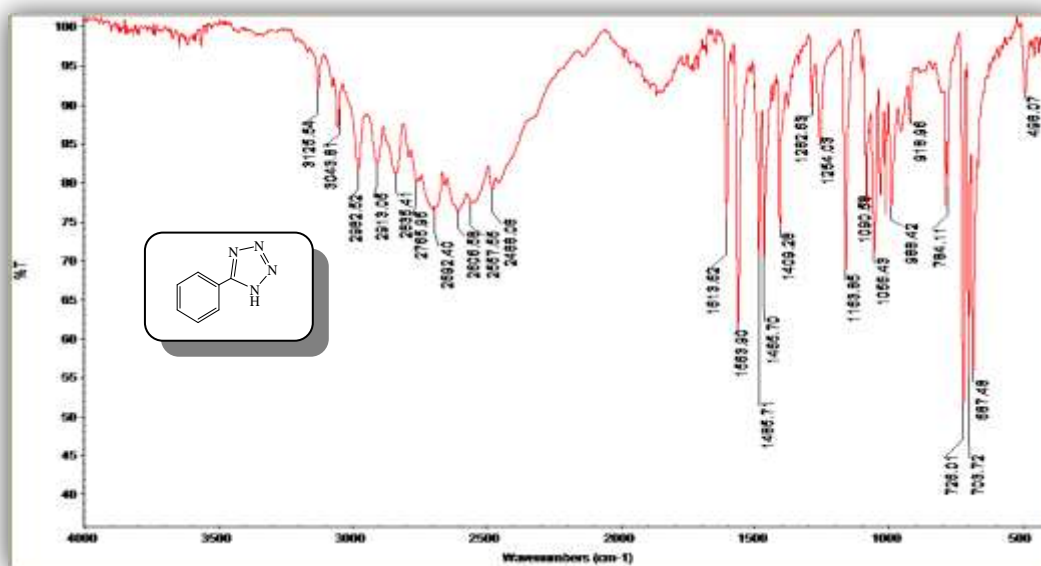

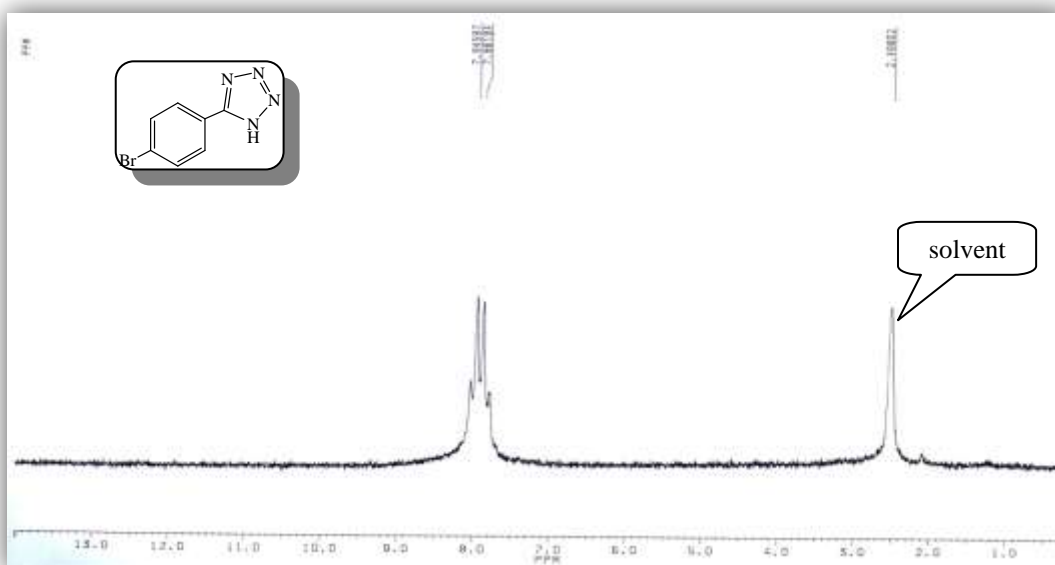

**Figure 19:** <sup>1</sup>H NMR (100 MHz, DMSO-d<sub>6</sub>) of 5-(4-Bromophenyl)-1*H*-tetrazole (Table 2, entry 2).

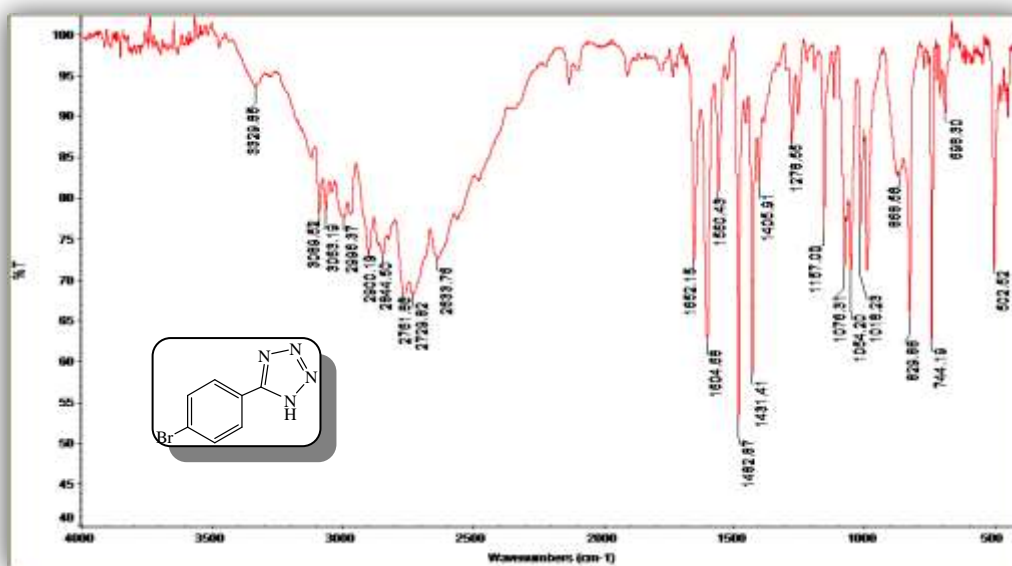

**Figure 20:** FT-IR (KBr) of 5-(4-Bromophenyl)-1*H*-tetrazole (Table 2, entry 2).

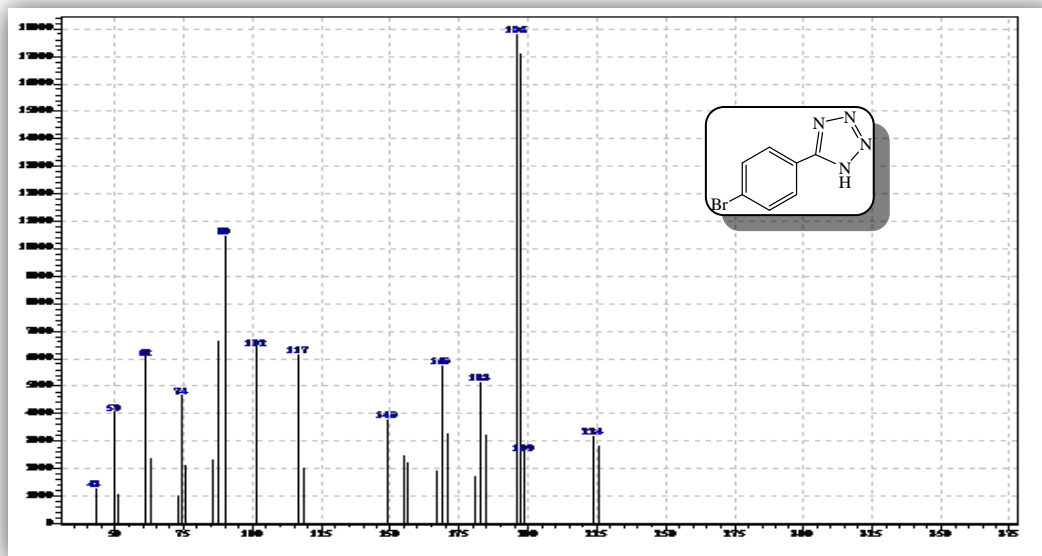

Figure 21: Mass spectrum of 5-(4-Bromophenyl)-1H-tetrazole (Table 2, entry 2).

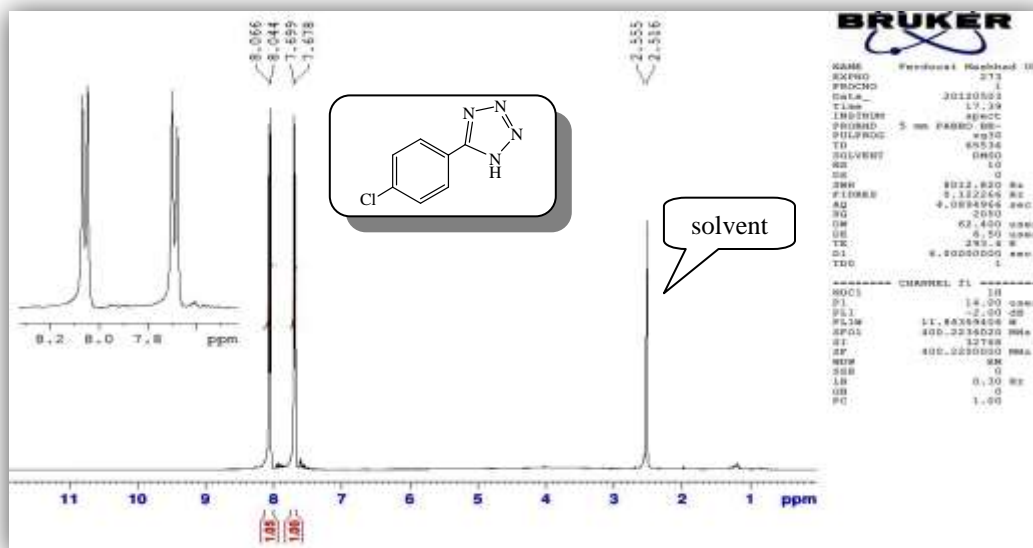

Figure 22: <sup>1</sup>H NMR (400 MHz, DMSO-d<sub>6</sub>) of 5-(4-Chlorophenyl)-1H-tetrazole (Table 2, entry 3).

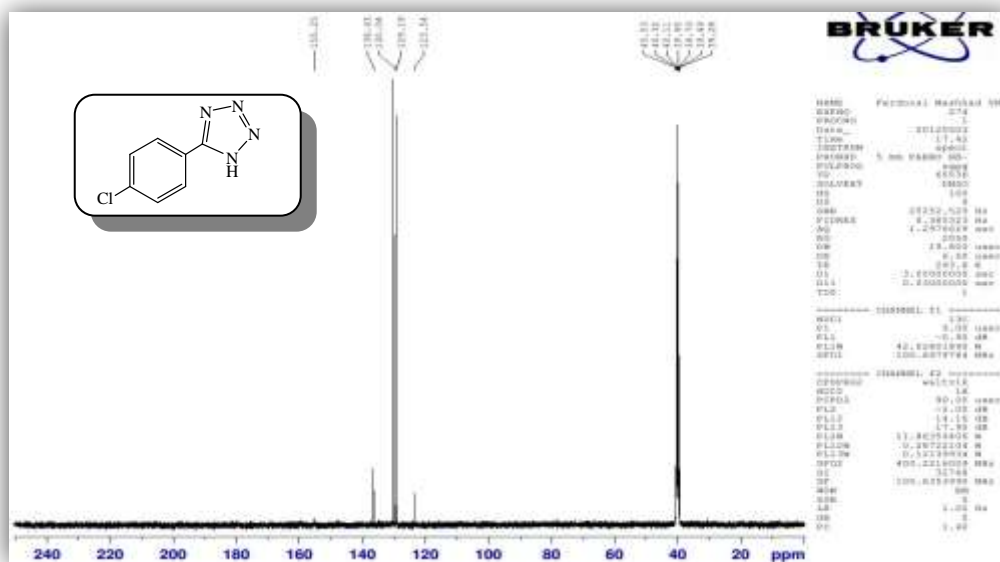

**Figure 23:** <sup>13</sup>C NMR (100 MHz, DMSO-d<sub>6</sub>) of 5-(4-Chlorophenyl)-1*H*-tetrazole (Table 2, entry 3).

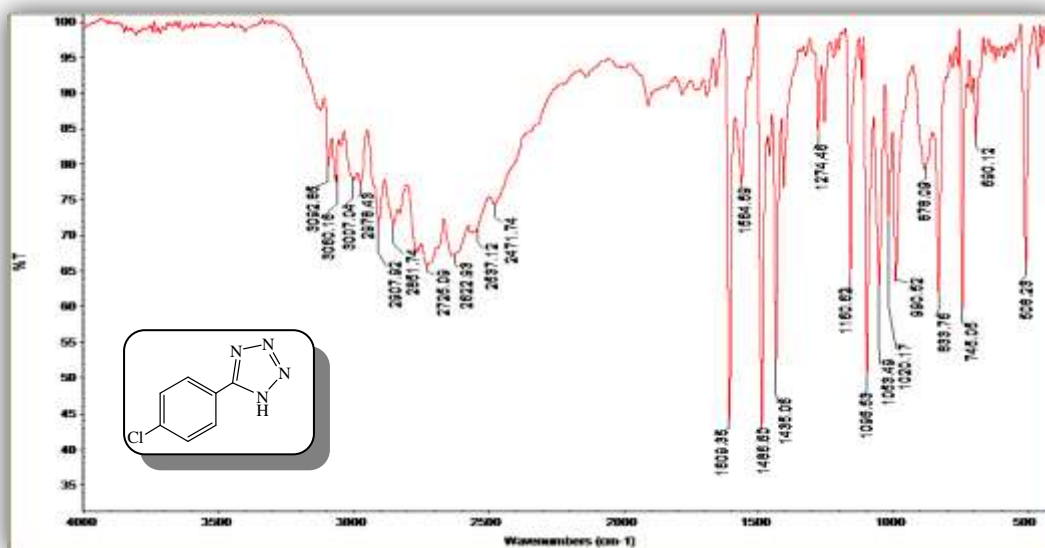

**Figure 24:** FT-IR (KBr) of 5-(4-Chlorophenyl)-1*H*-tetrazole (Table 2, entry 3).

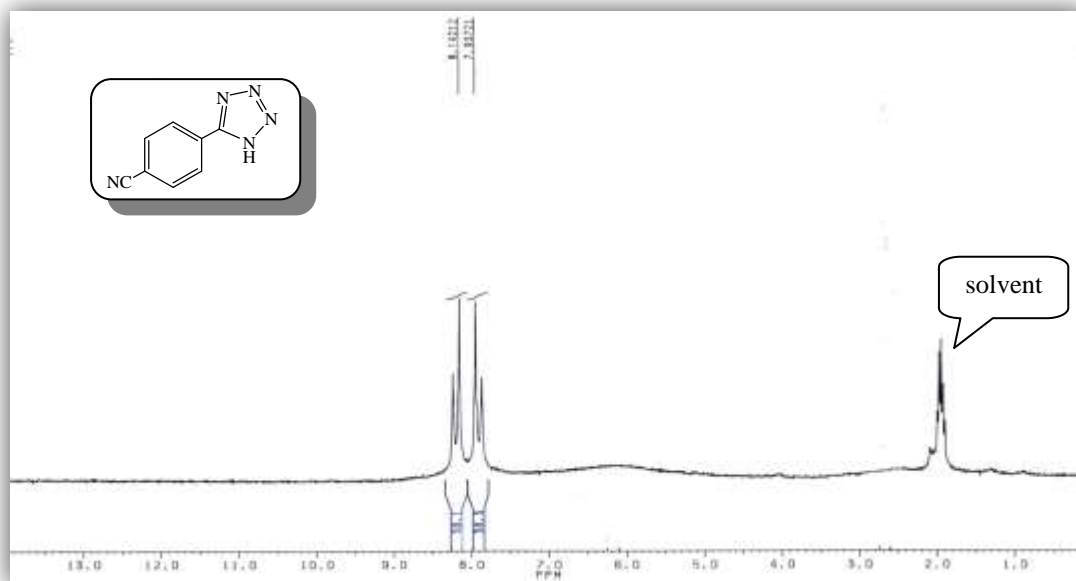

**Figure 25:** <sup>1</sup>H NMR (100 MHz, CD<sub>3</sub>CN) of 4-(1*H*-tetrazol-5-yl)benzonitrile (Table 2, entry 4).

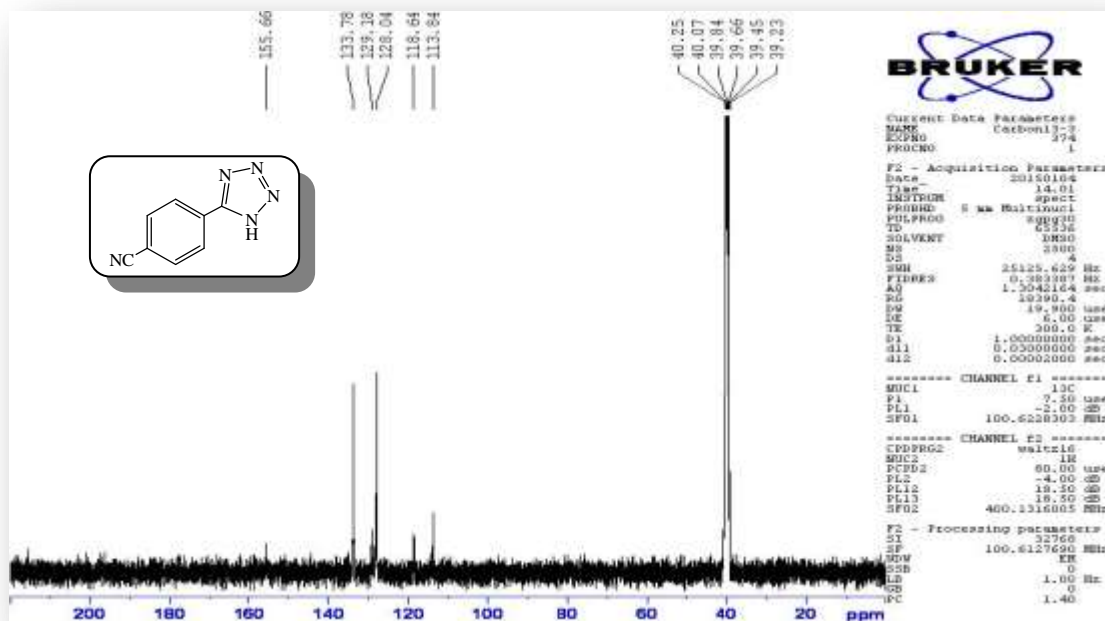

**Figure 26:** <sup>13</sup>C NMR (400 MHz, DMSO-*d*<sub>6</sub>) of 4-(1*H*-tetrazol-5-yl)benzonitrile (Table 2, entry 4).

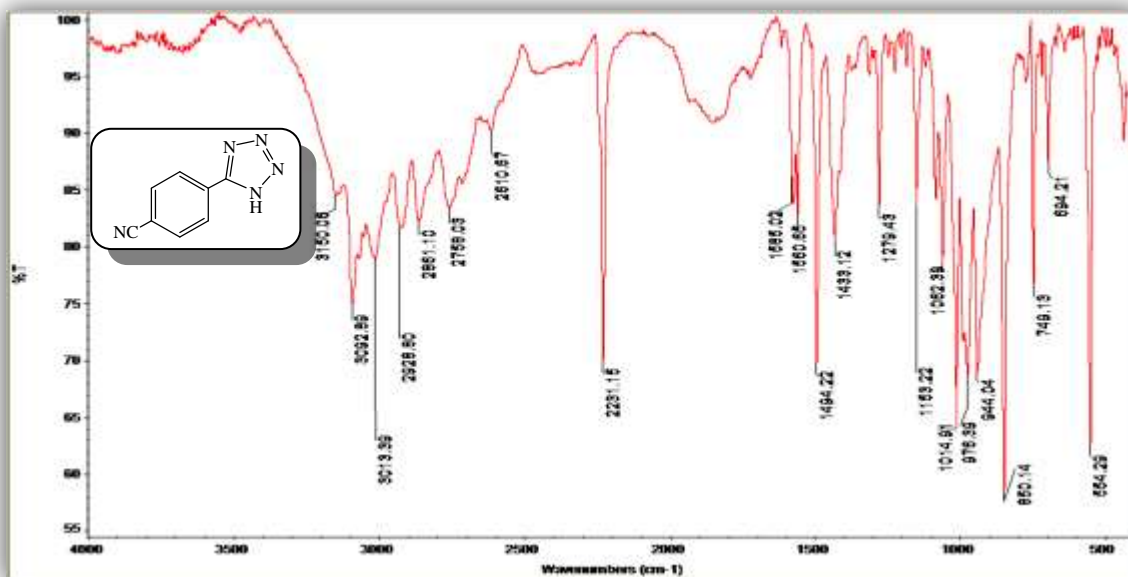

**Figure 27:** FT-IR (KBr) of 4-(1H-tetrazol-5-yl)benzonitrile (Table 2, entry 4).

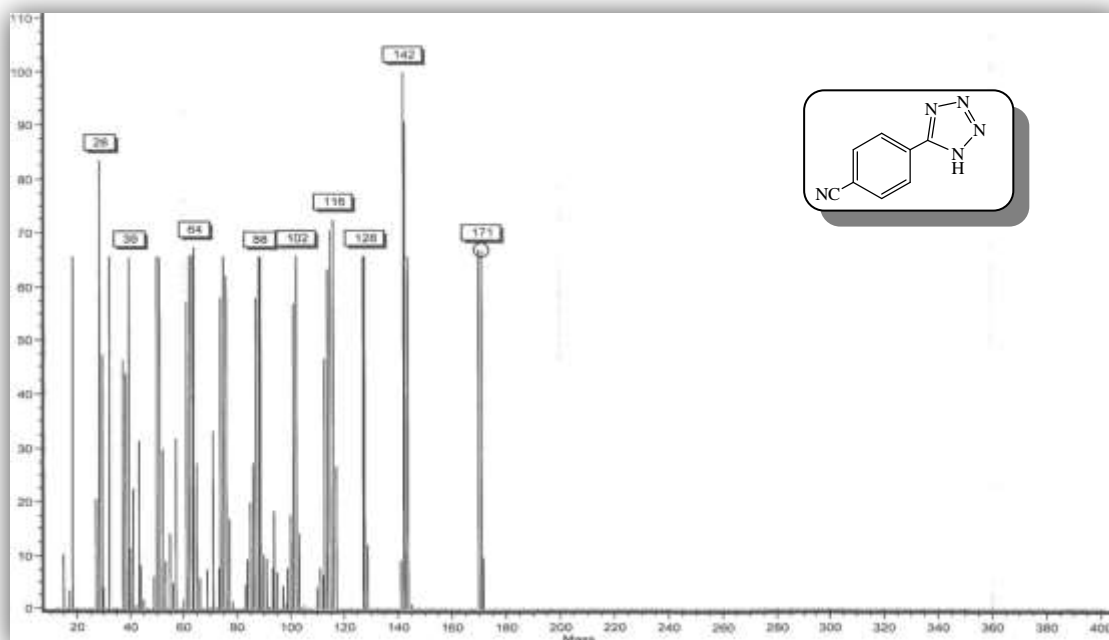

**Figure 28:** Mass spectrum of 4-(1H-tetrazol-5-yl)benzonitrile (Table 2, entry 4).

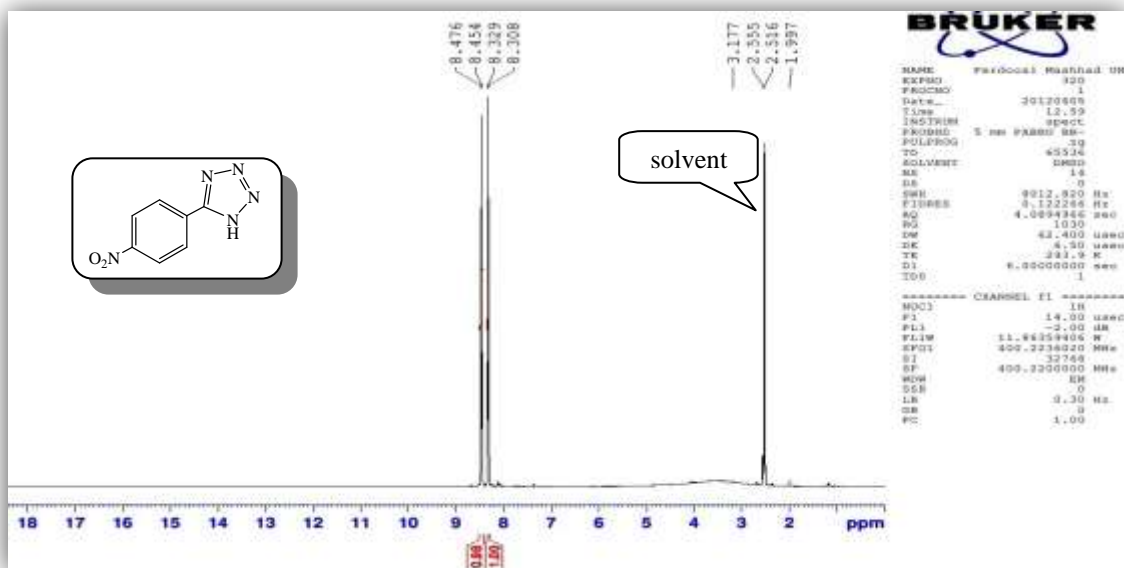

Figure 29:  $^1\text{H}$  NMR (400 MHz,  $\text{DMSO-d}_6$ ) of 5-(4-Nitrophenyl)-1H-tetrazole (Table 2, entry 5).

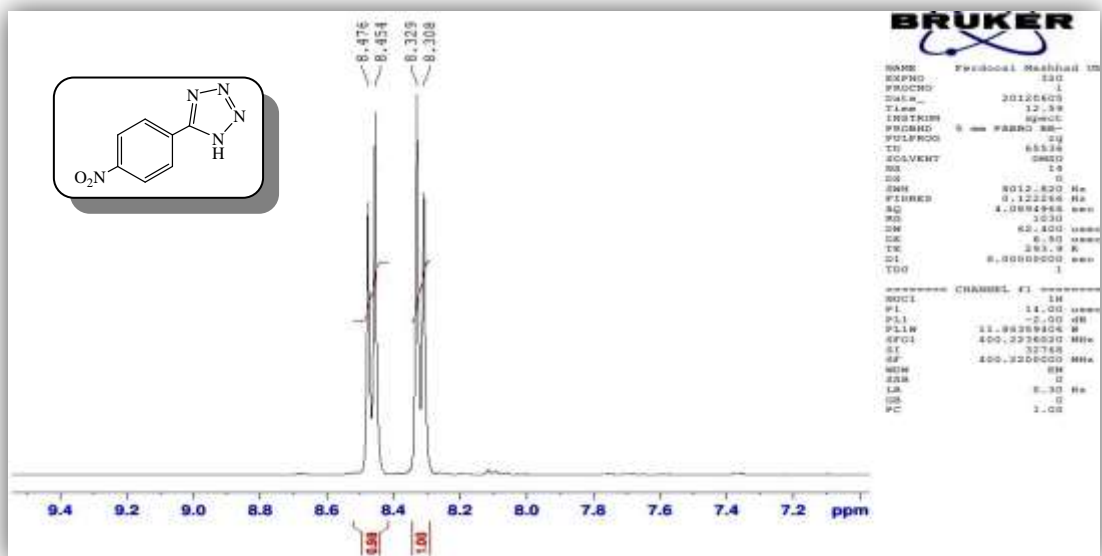

Figure 30:  $^1\text{H}$  NMR (400 MHz,  $\text{DMSO-d}_6$ ) of 5-(4-Nitrophenyl)-1H-tetrazole (Table 2, entry 5) expanded.



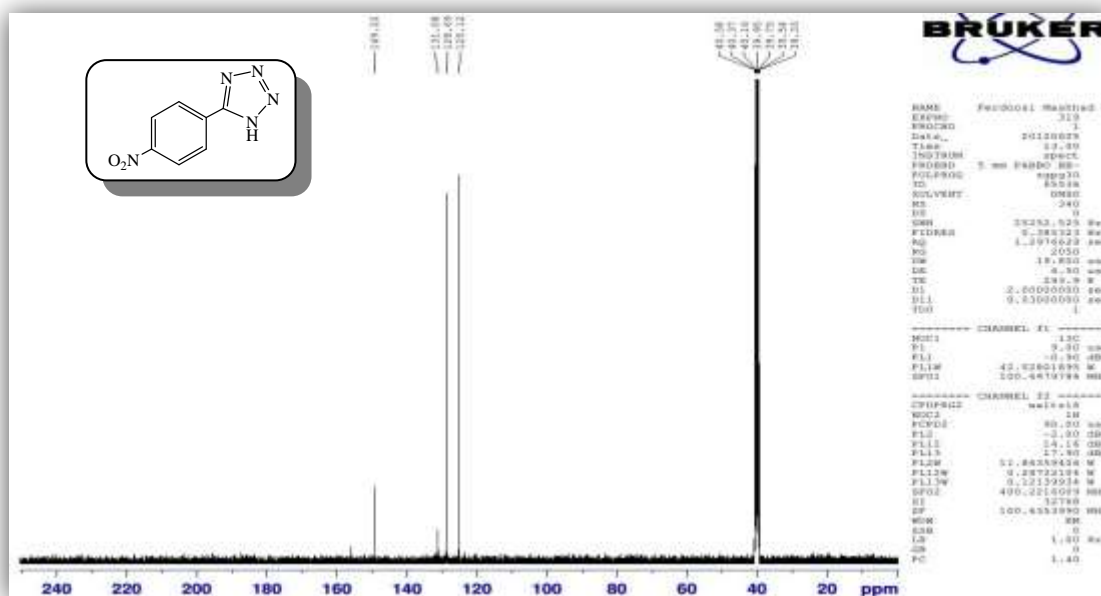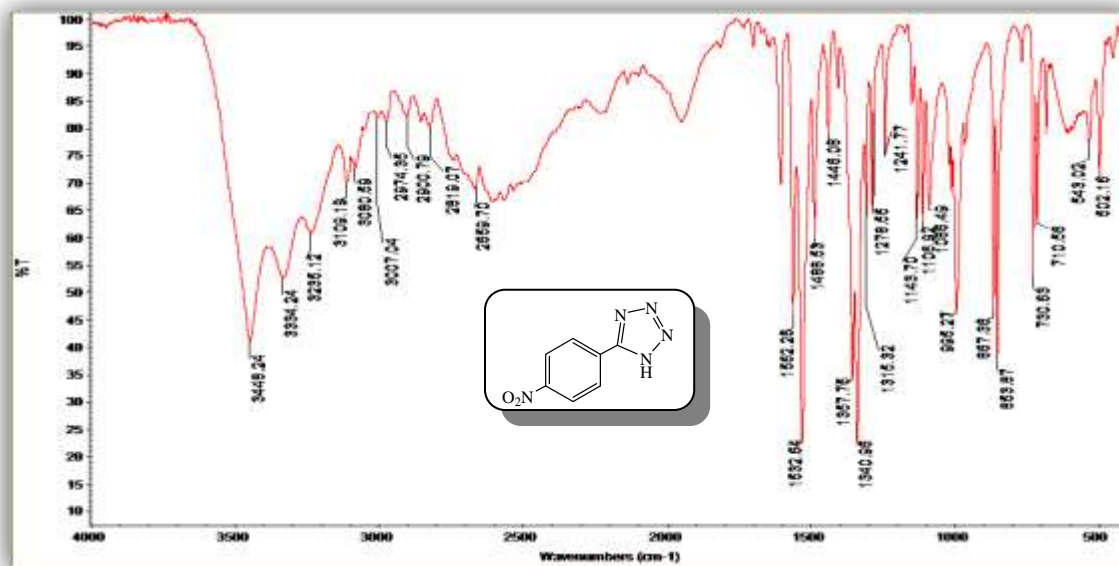

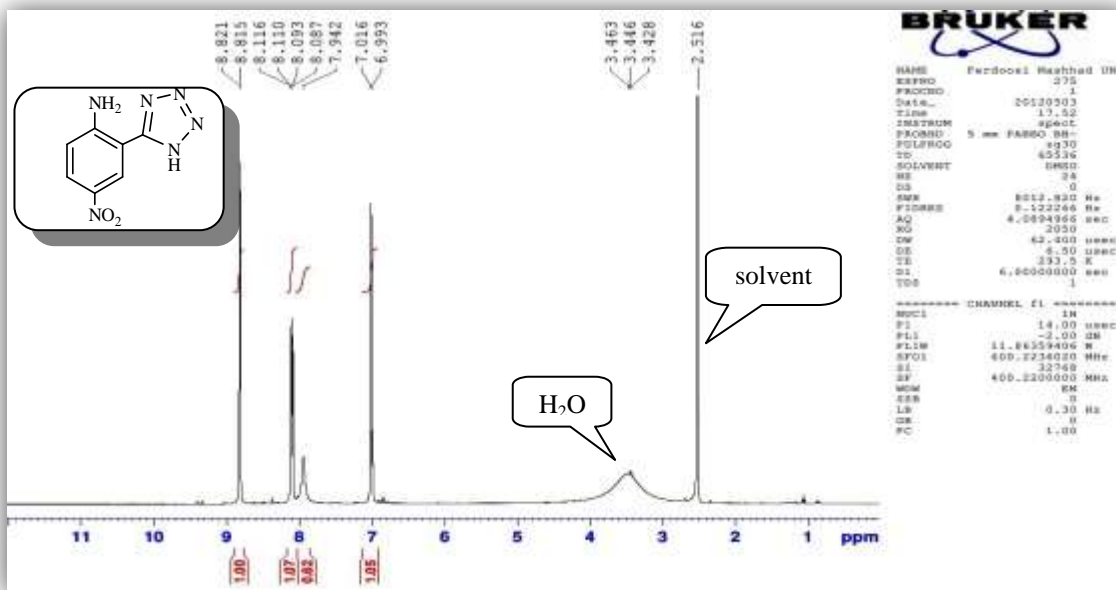

**Figure 33:**  $^1\text{H}$  NMR (400 MHz, DMSO- $d_6$ ) of 4-Nitro-2-(1*H*-tetrazol-5-yl)benzenamine (Table 2, entry 6).

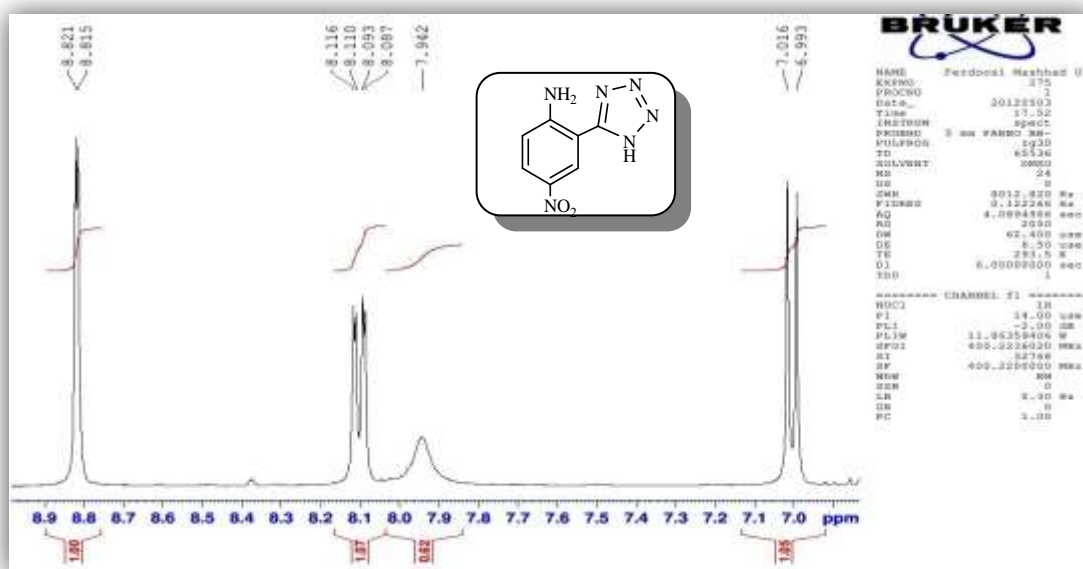

**Figure 34:**  $^1\text{H}$  NMR (400 MHz, DMSO- $d_6$ ) of 4-Nitro-2-(1*H*-tetrazol-5-yl)benzenamine (Table 2, entry 6) expanded.



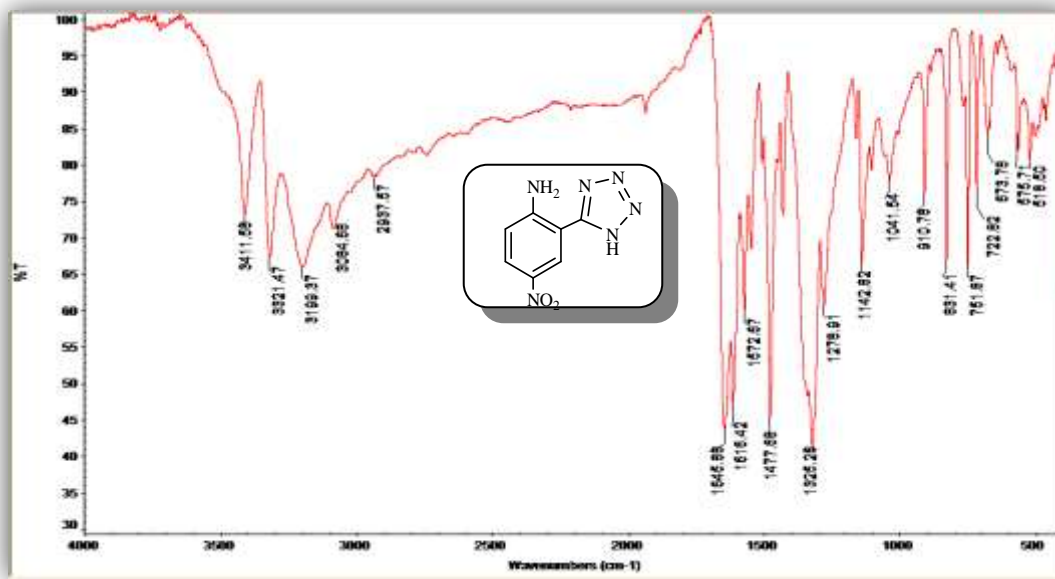

**Figure 37:** FT-IR (KBr) of 4-Nitro-2-(1*H*-tetrazol-5-yl)benzenamine (Table 2, entry 6).

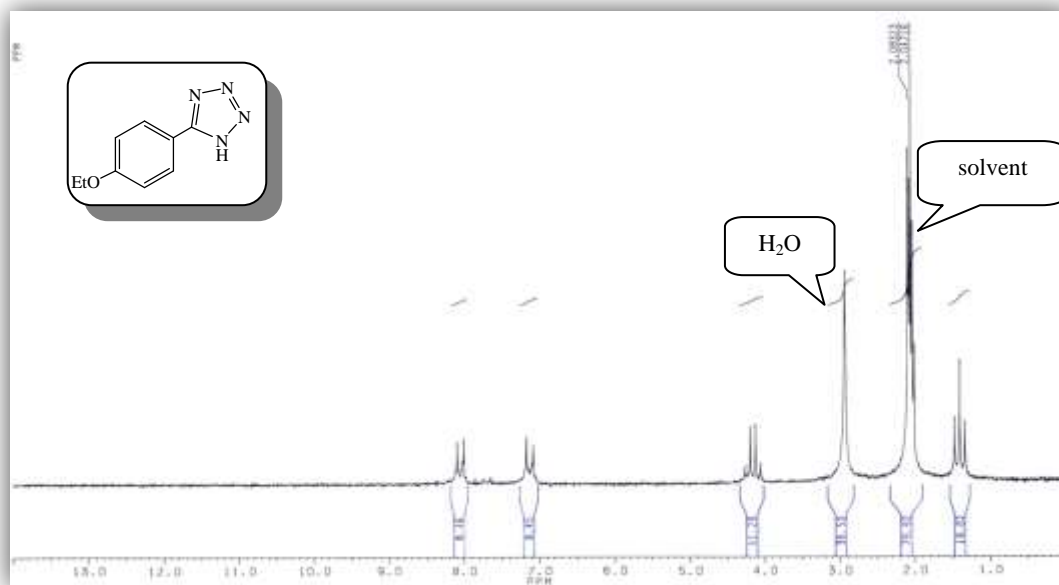

**Figure 38:**  $^1\text{H}$  NMR (100 MHz, acetone- $\text{d}_6$ ) of 5-(4-Ethoxyphenyl)-1*H*-tetrazole (Table 2, entry 7).

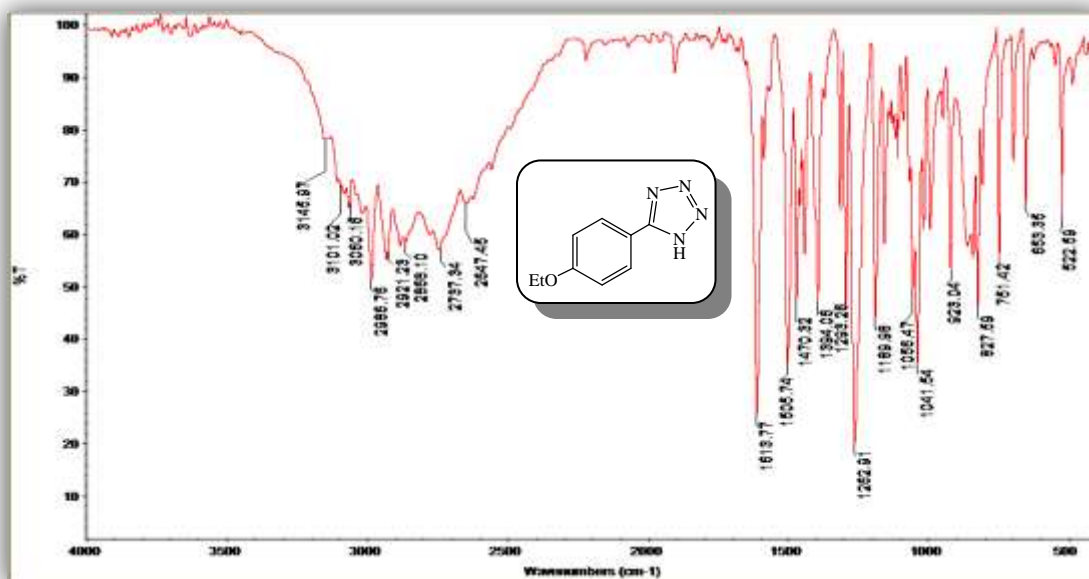

**Figure 39:** FT-IR (KBr) of 5-(4-Ethoxyphenyl)-1*H*-tetrazole (Table 2, entry 7).

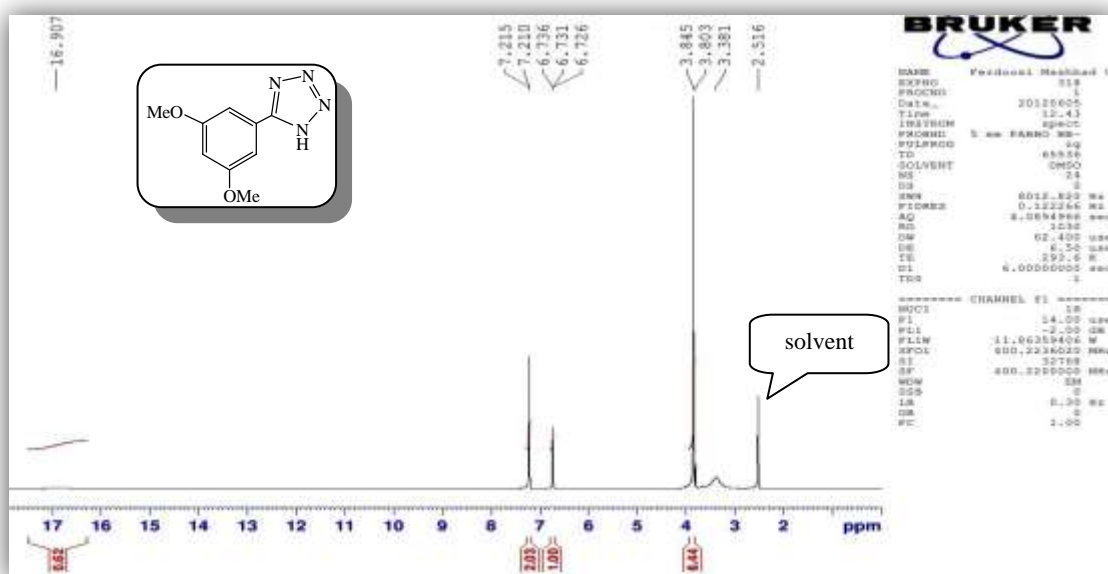

**Figure 40:**  $^1\text{H}$  NMR (400 MHz,  $\text{DMSO-d}_6$ ) of 5-(3,5-Dimethoxyphenyl)-1*H*-tetrazole (Table 2, entry 8).

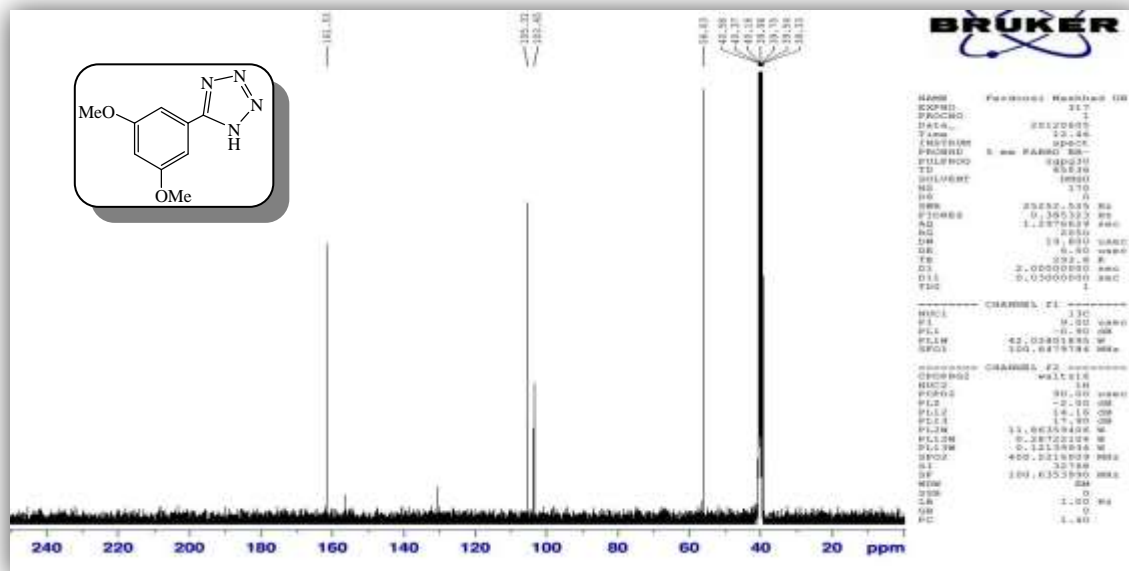

**Figure 41:**  $^{13}\text{C}$  NMR (100 MHz, DMSO- $d_6$ ) of 5-(3,5-Dimethoxyphenyl)-1H-tetrazole (Table 2, entry 8).

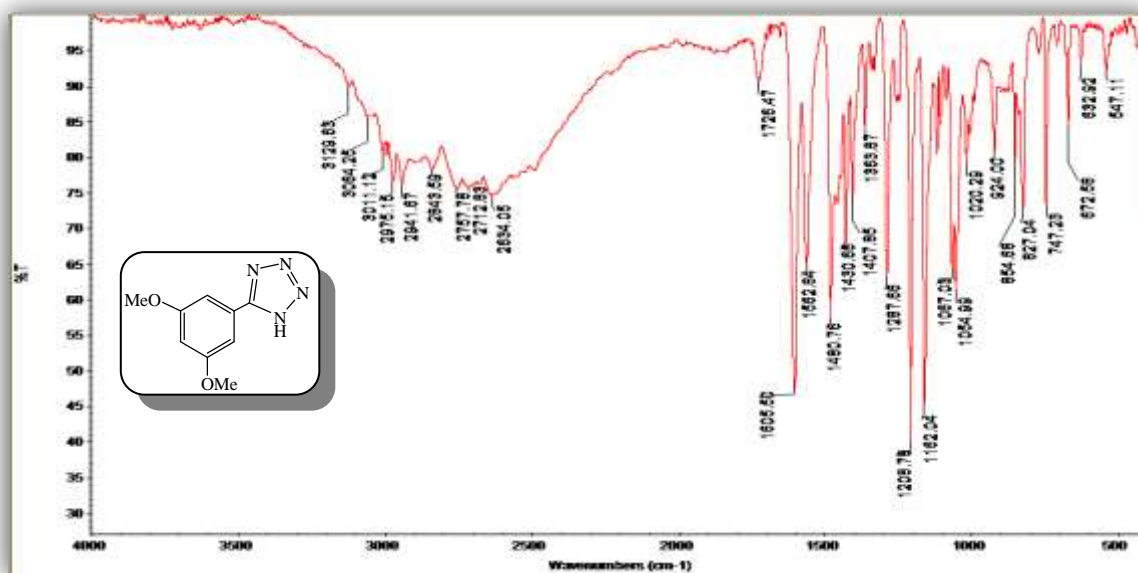

**Figure 42:** FT-IR (KBr) of 5-(3,5-Dimethoxyphenyl)-1H-tetrazole (Table 2, entry 8).

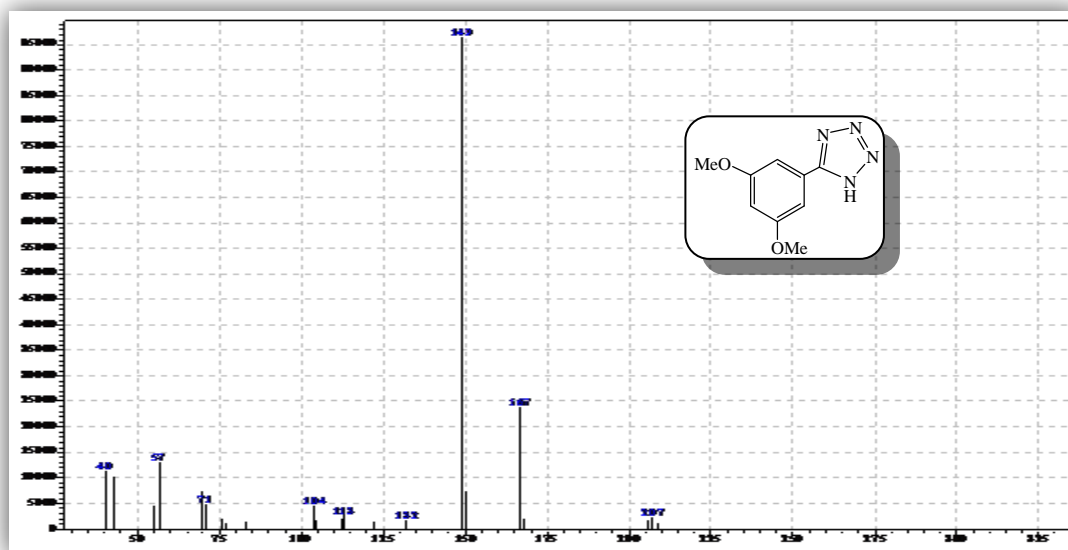

**Figure 43:** Mass spectrum of 5-(3,5-Dimethoxyphenyl)-1H-tetrazole (Table 2, entry 8).

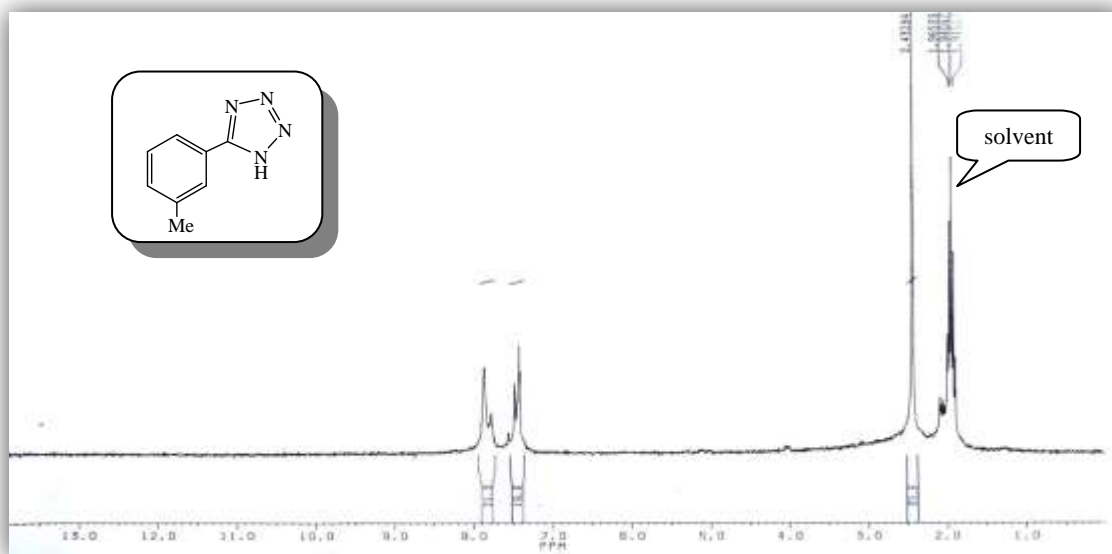

**Figure 44:** <sup>1</sup>H NMR (100 MHz, CD<sub>3</sub>CN) of 5-m-Tolyl-1H-tetrazole (Table 2, entry 9).

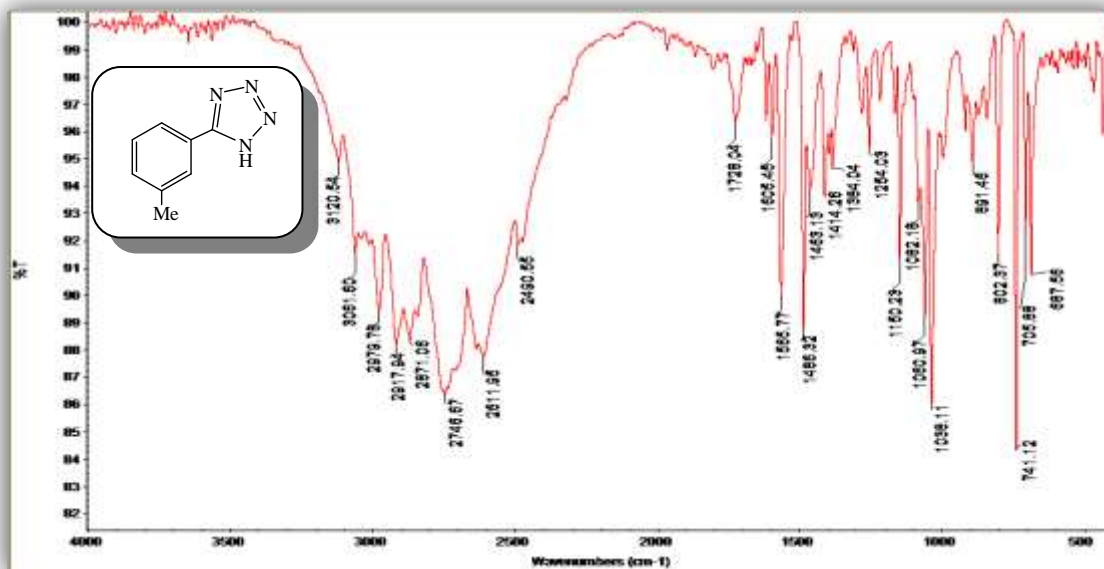

**Figure 45:** FT-IR (KBr) of 5-*m*-Tolyl-1*H*-tetrazole (Table 2, entry 9).

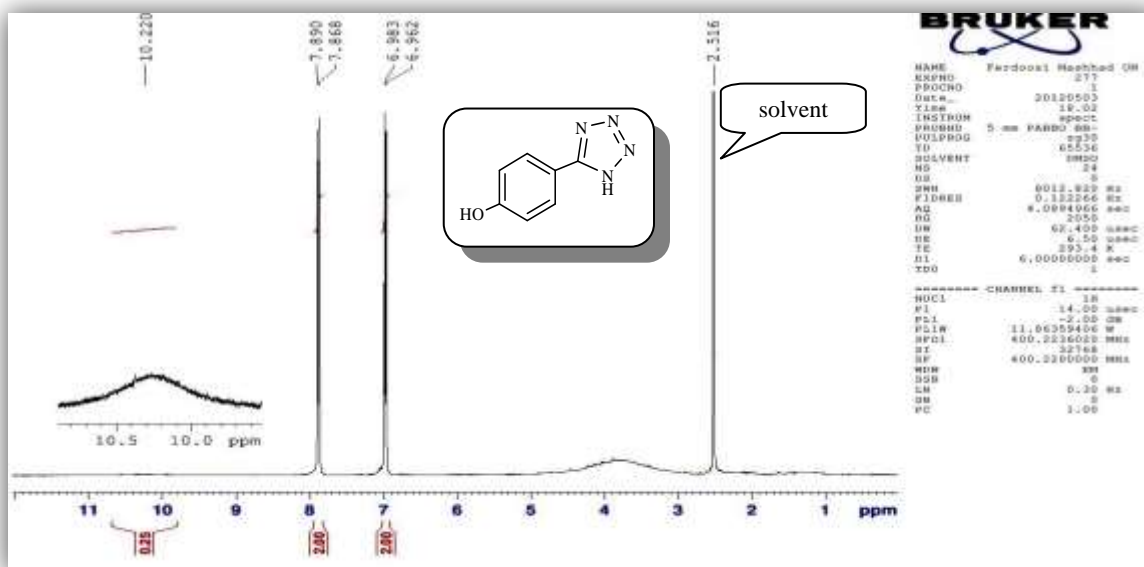

**Figure 46:**  $^1\text{H}$  NMR (400 MHz,  $\text{DMSO}-d_6$ ) of 4-(1*H*-tetrazol-5-yl) phenol (Table 2, entry 10).



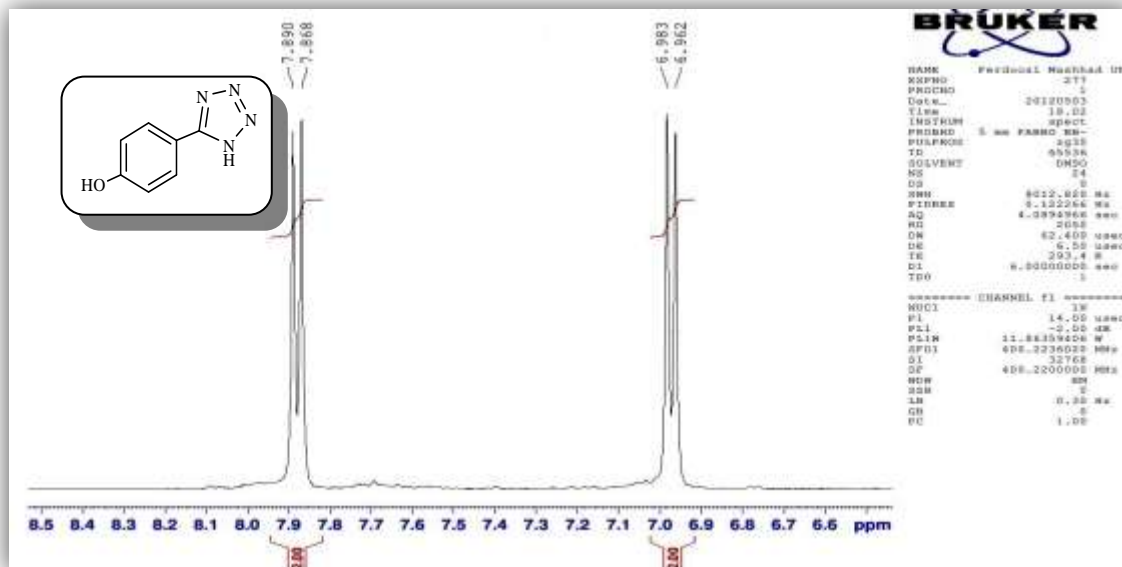

**Figure 47:**  $^1\text{H}$  NMR (400 MHz,  $\text{DMSO-d}_6$ ) of 4-(1*H*-tetrazol-5-yl)phenol (Table 2, entry 10) expanded.

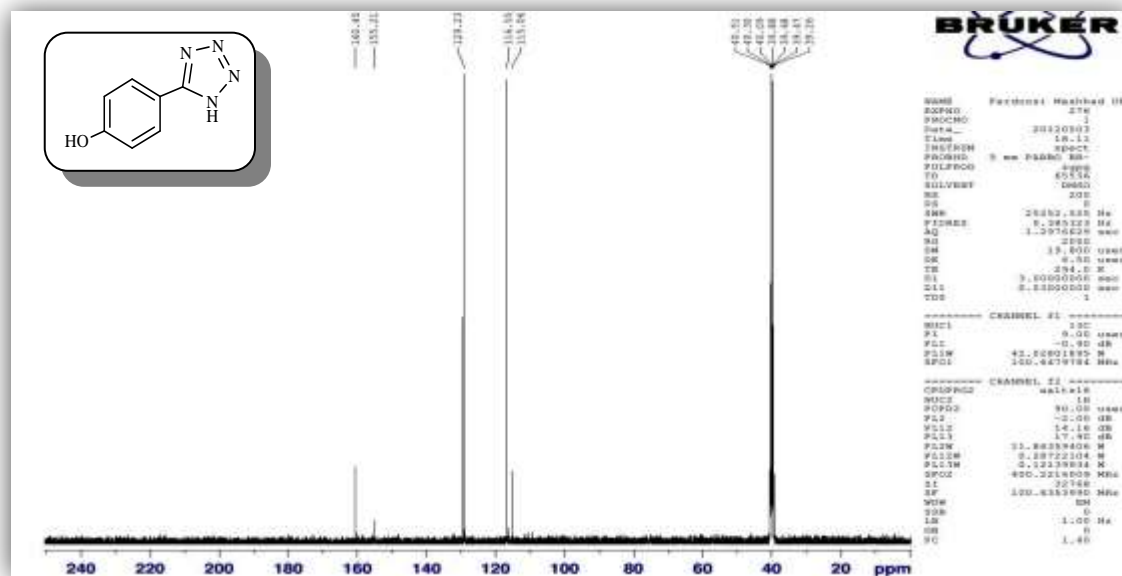

**Figure 48:**  $^{13}\text{C}$  NMR (100 MHz,  $\text{DMSO-d}_6$ ) of 4-(1*H*-tetrazol-5-yl)phenol (Table 2, entry 10).

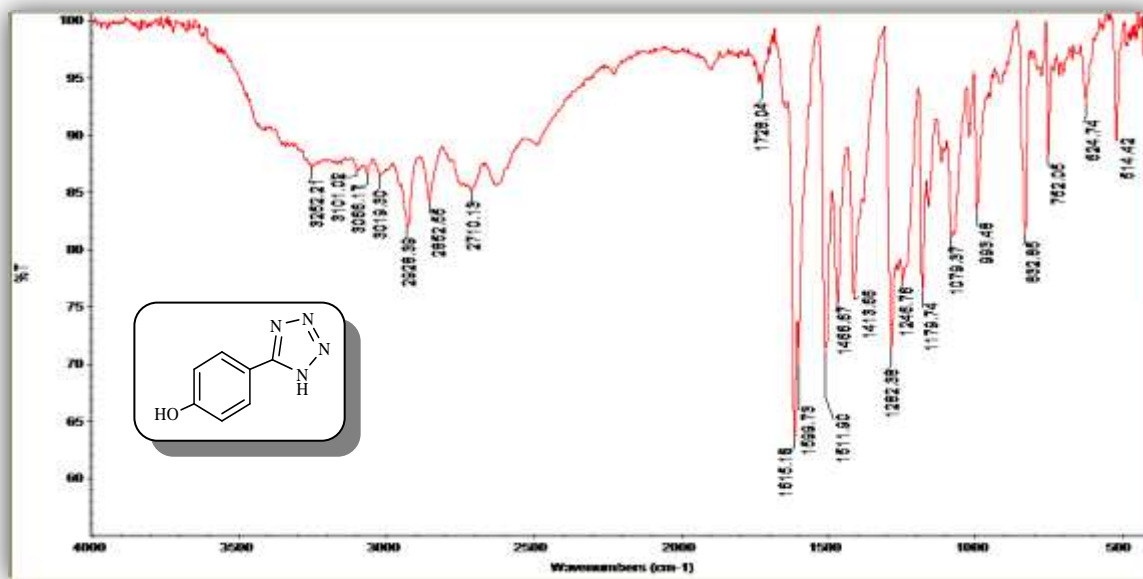

**Figure 49:** FT-IR (KBr) of 4-(1*H*-tetrazol-5-yl) phenol (Table 2, entry 10).

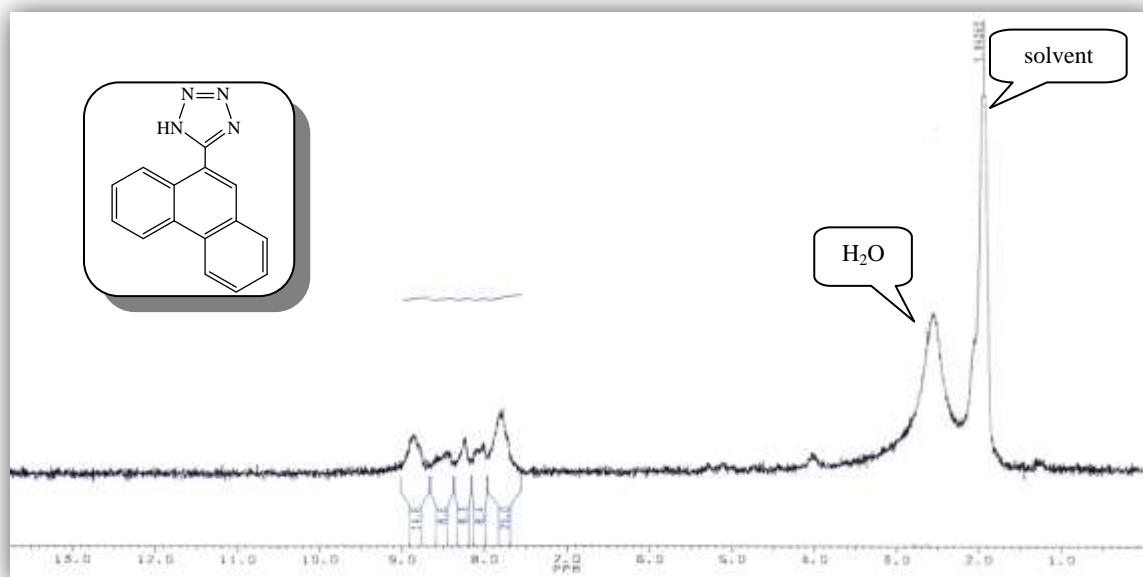

**Figure 50:** <sup>1</sup>H NMR (100 MHz, DMSO-*d*<sub>6</sub>) of 5-(Phenanthren-9-yl)-1*H*-tetrazole (Table 2, entry 11).

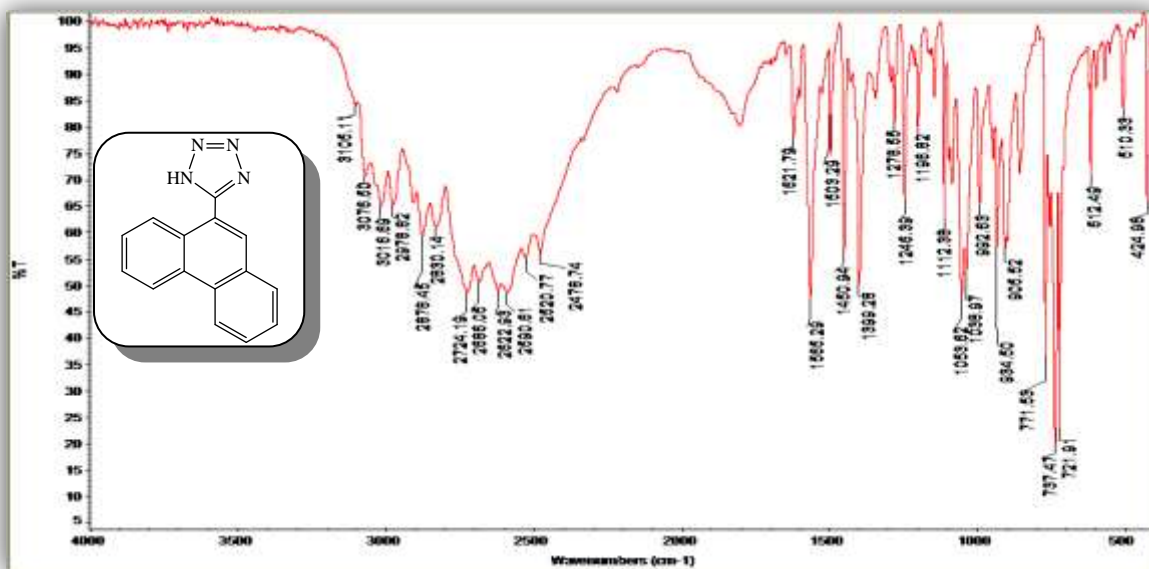

**Figure 51:** FT-IR (KBr) of 5-(Phenanthren-9-yl)-1H-tetrazole (Table 2, entry 11).

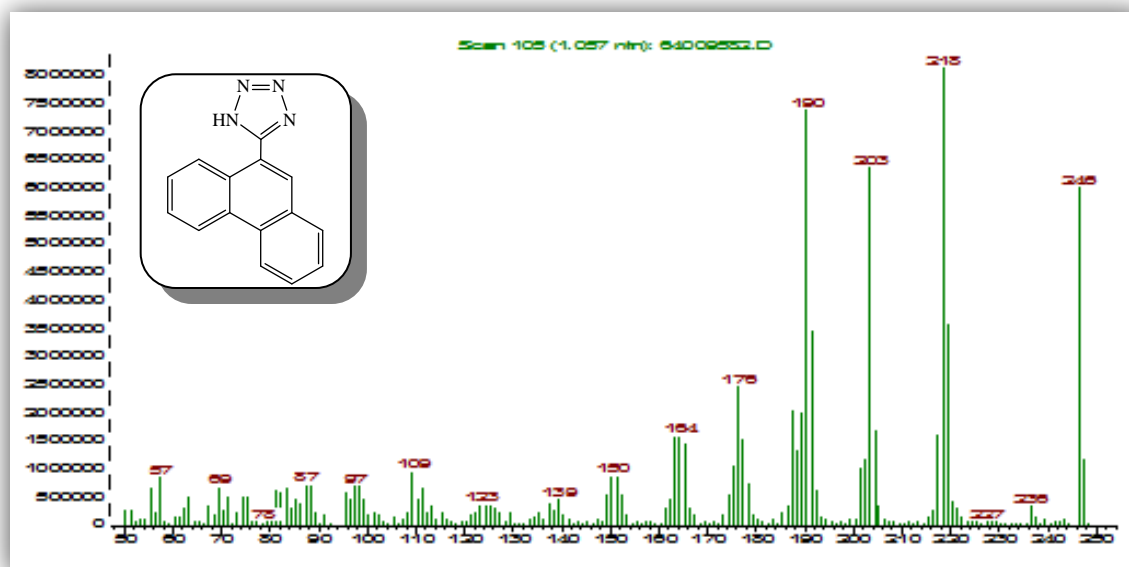

**Figure 52:** Mass spectrum of 5-(Phenanthren-9-yl)-1H-tetrazole (Table 2, entry 11).

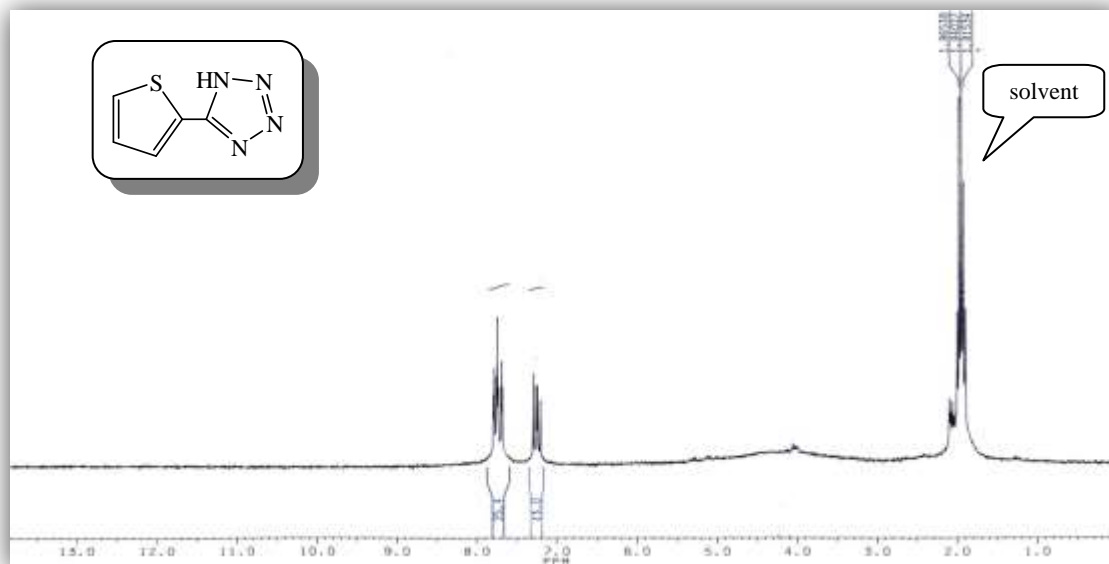

**Figure 53:**  $^1\text{H}$  NMR (100 MHz,  $\text{CD}_3\text{CN}$ ) of 5-(Thiophen-2-yl)-1*H*-tetrazole (Table 2, entry 12).

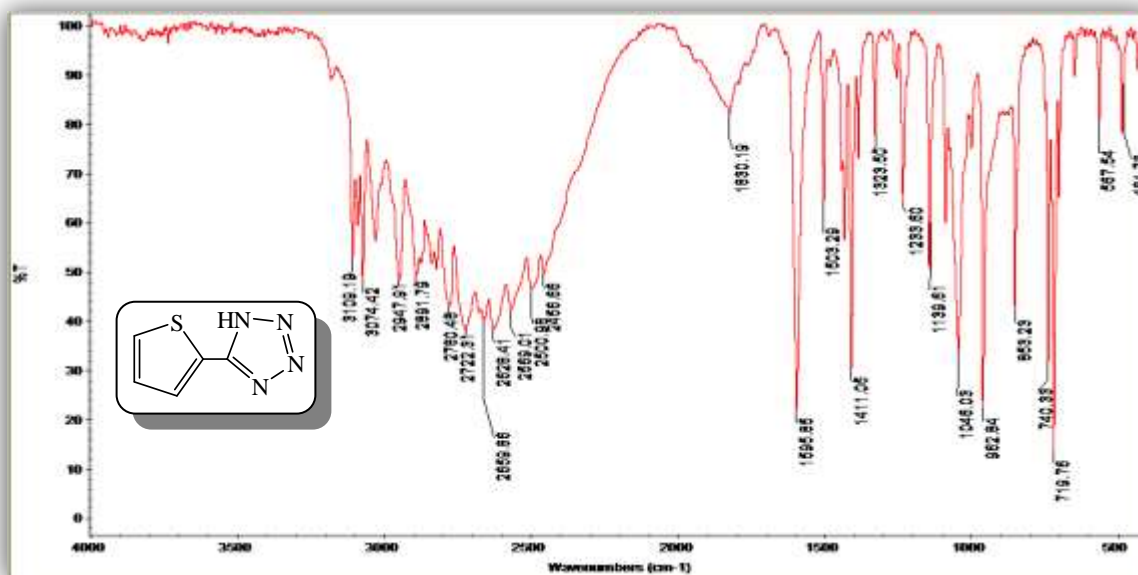

**Figure 54:** FT-IR (KBr) of 5-(Thiophen-2-yl)-1*H*-tetrazole (Table 2, entry 12).

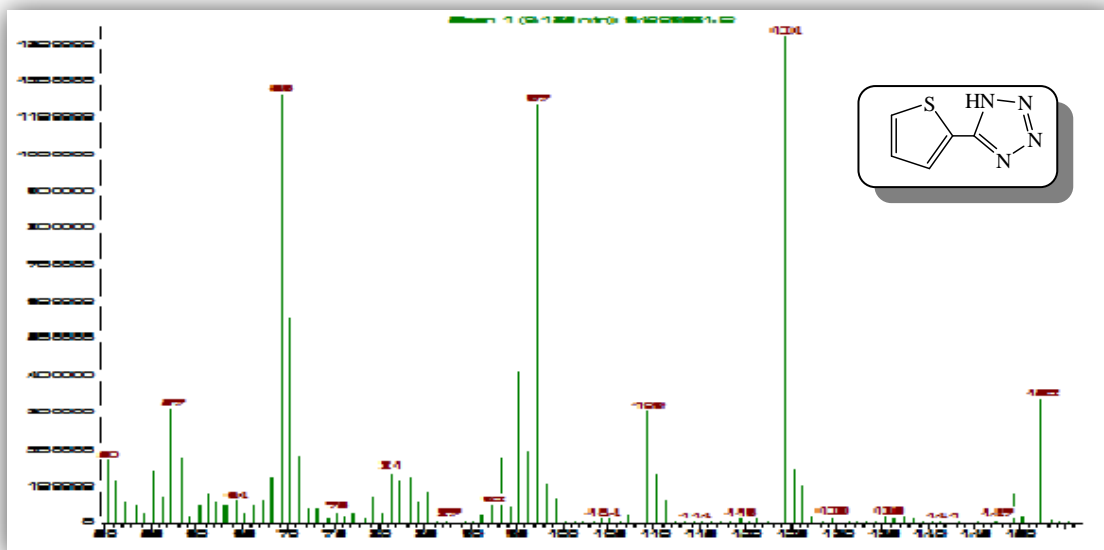

**Figure 55:** Mass spectrum of 5-(Thiophen-2-yl)-1H-tetrazole (Table 2, entry 12).

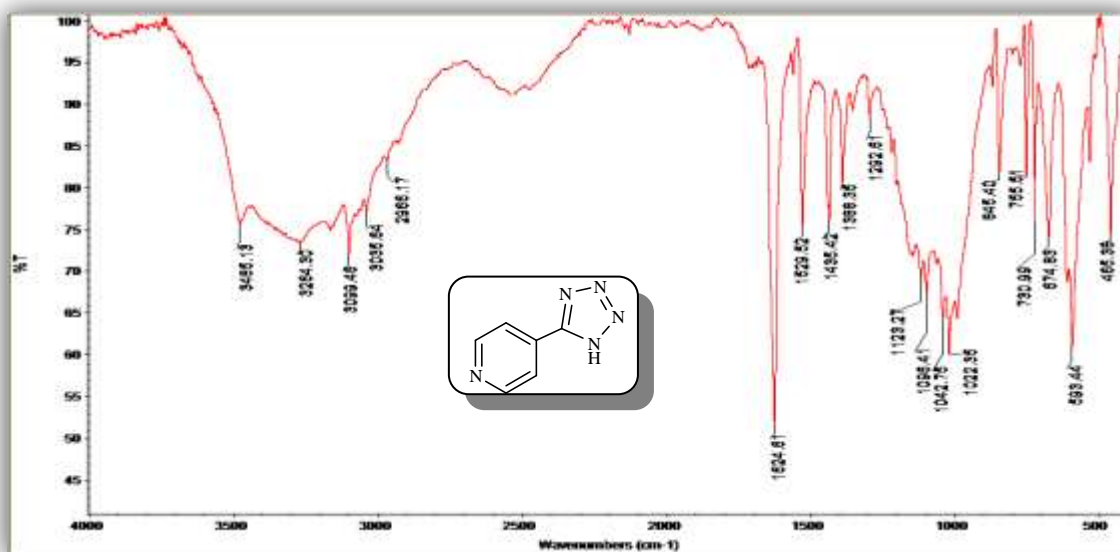

**Figure 56:** FT-IR (KBr) of 4-(1H-tetrazol-5-yl)pyridine (Table 2, entry 13).

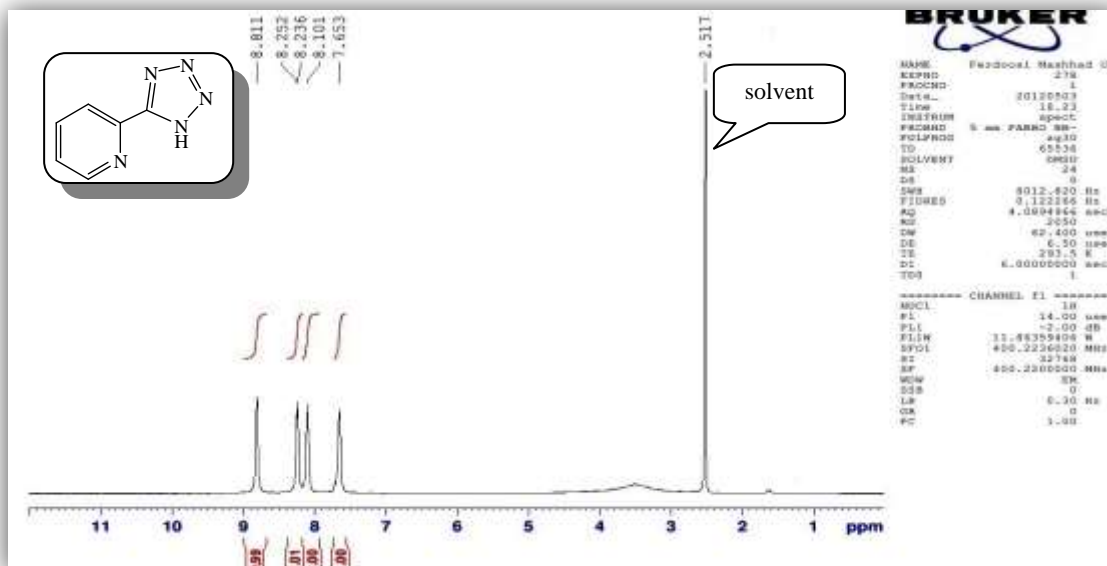

**Figure 57:** <sup>1</sup>H NMR (400 MHz, DMSO-d<sub>6</sub>) of 2-(1*H*-tetrazol-5-yl)pyridine (Table 2, entry 14).

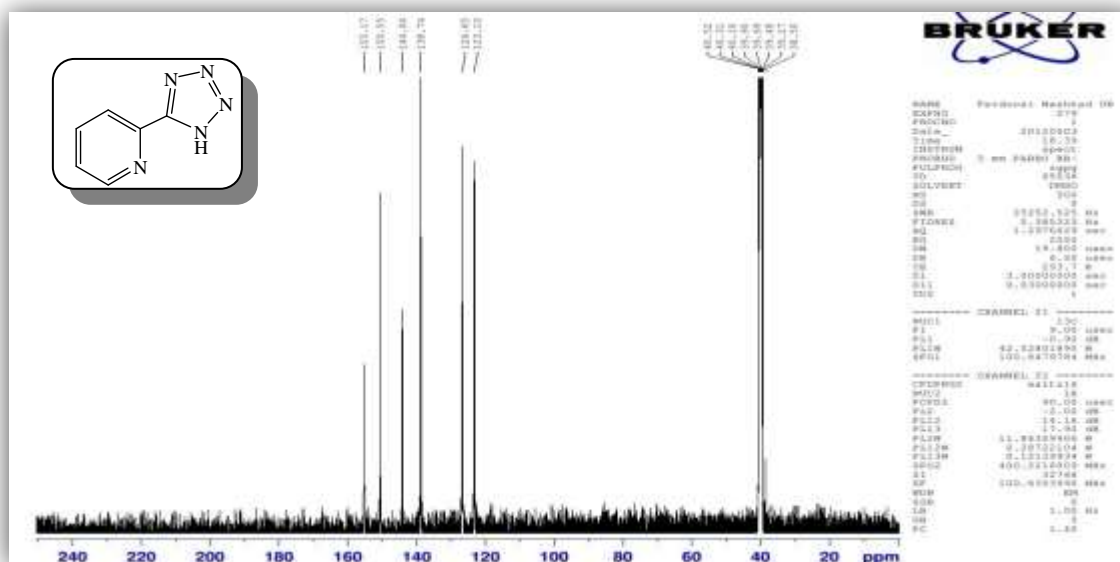

**Figure 58:** <sup>13</sup>C NMR (100 MHz, DMSO-d<sub>6</sub>) of 2-(1*H*-tetrazol-5-yl) pyridine (Table 2, entry 14).

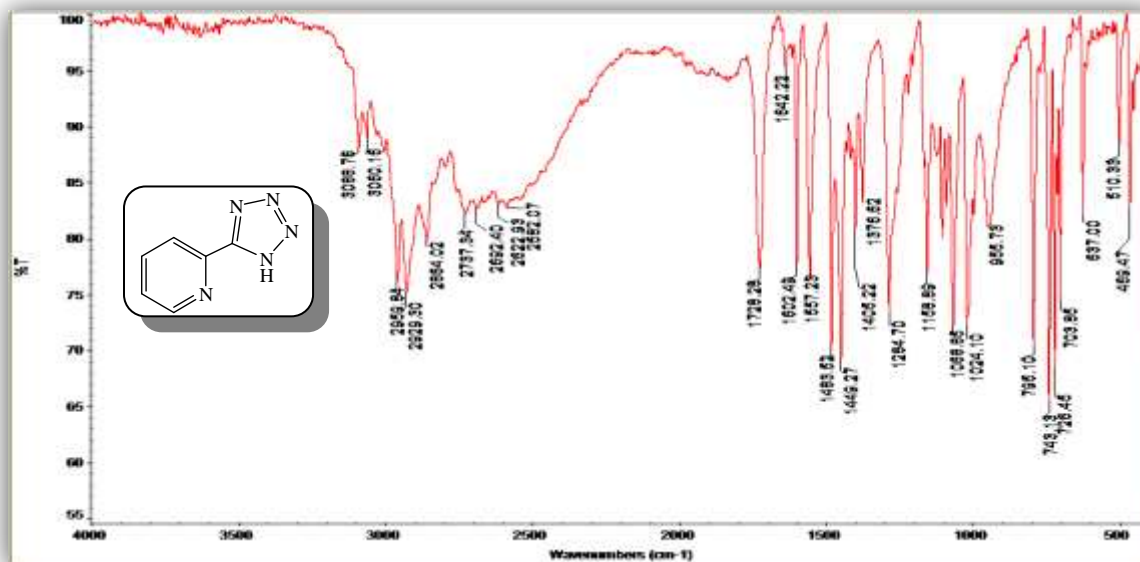

**Figure 59:** FT-IR of 2-(1*H*-tetrazol-5-yl) pyridine (Table 2, entry 14).

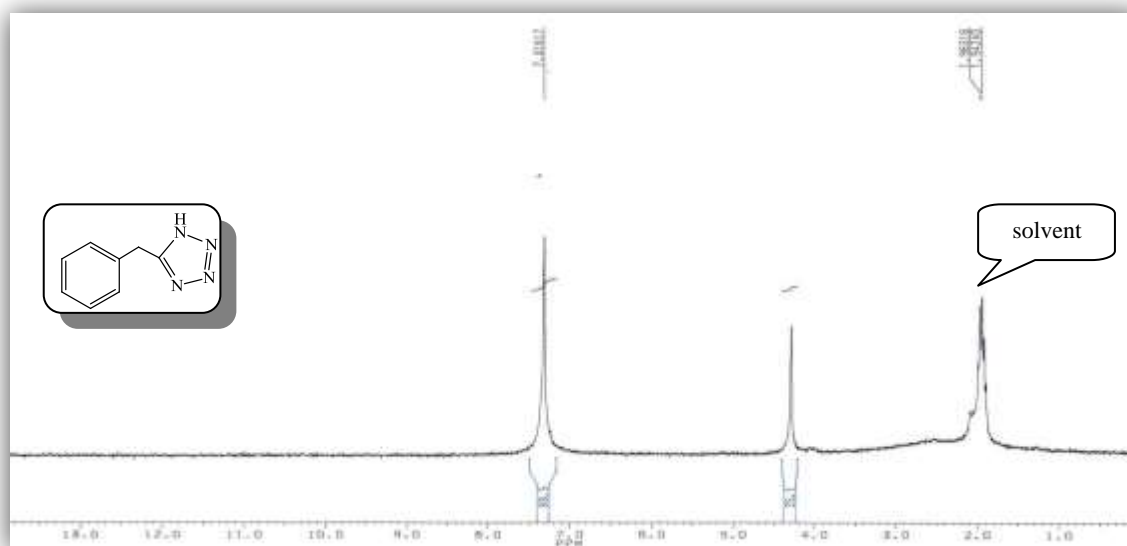

**Figure 60:**  $^1\text{H}$  NMR (100 MHz,  $\text{CD}_3\text{CN}$ ) of 5-Benzyl-1*H*-tetrazole (Table 2, entry 15).

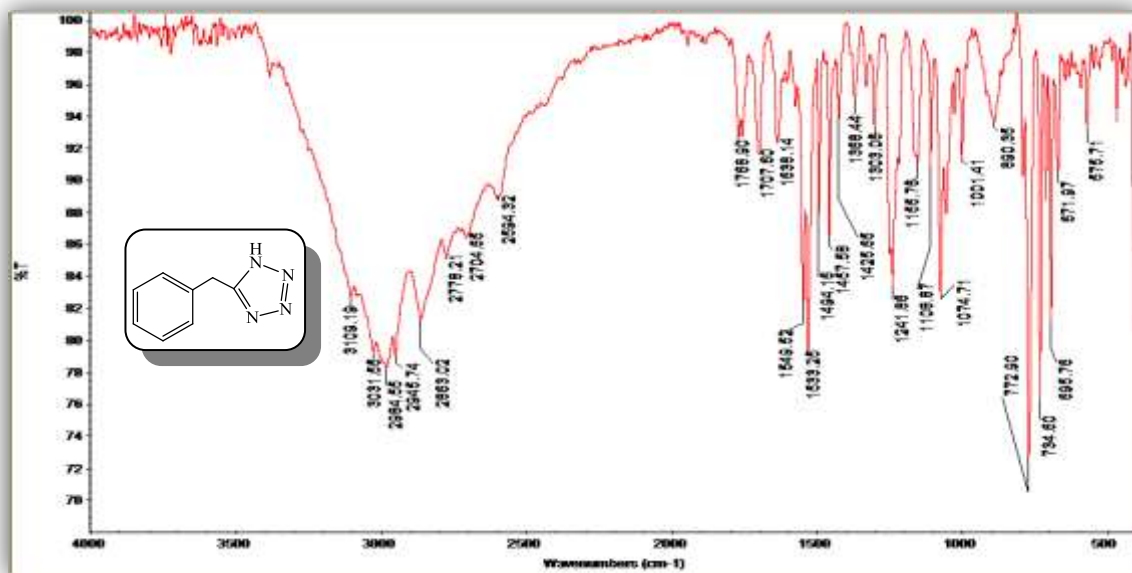

Figure 61: FT-IR of 5-Benzyl-1*H*-tetrazole (Table 2, entry 15).

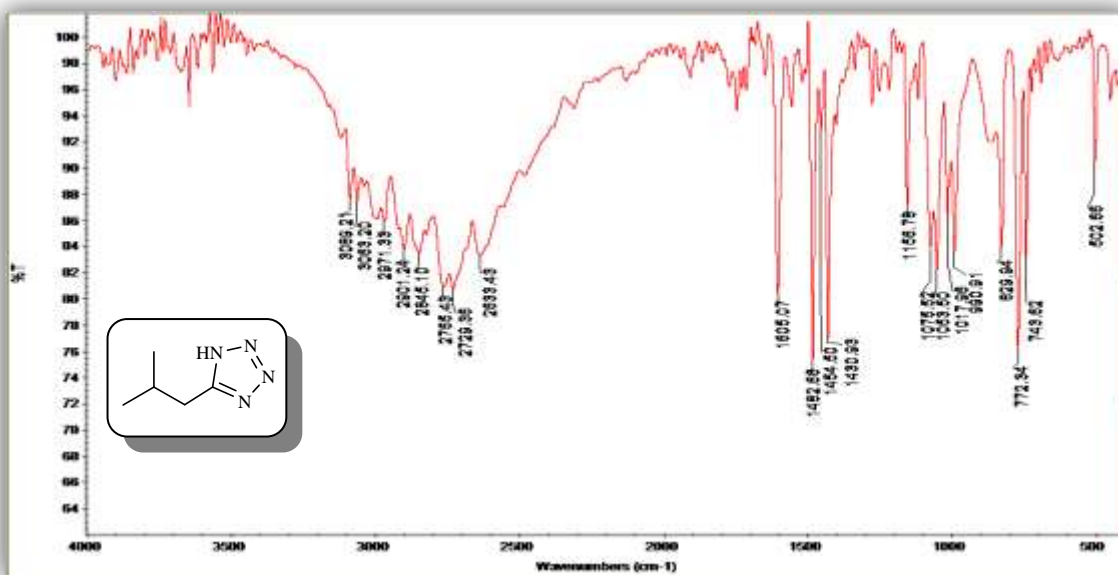

Figure 62: FT-IR of 5-Isobutyl-1*H*-tetrazole (Table 2, entry 16).



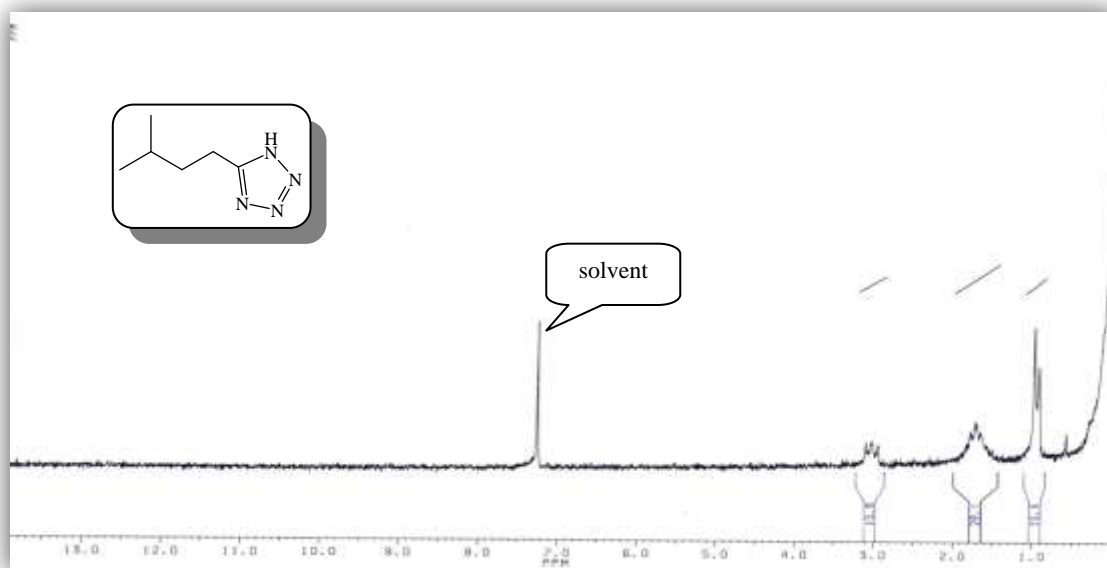

**Figure 63:** <sup>1</sup>H NMR (100 MHz, CDCl<sub>3</sub>) of 5-Isopentyl-1*H*-tetrazole (Table 2, entry 17).

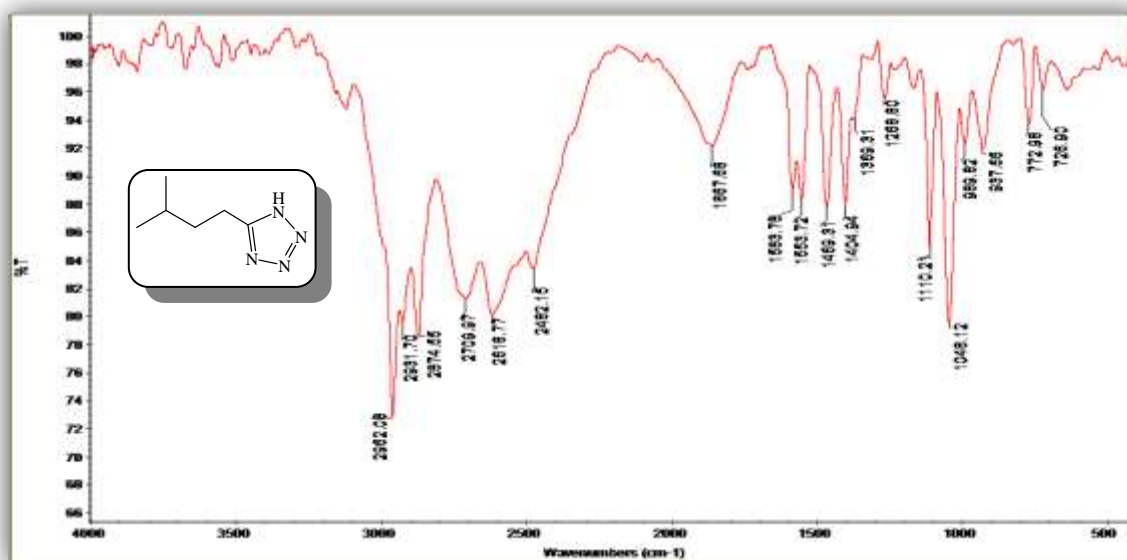

**Figure 64:** FT-IR of 5-Isopentyl-1*H*-tetrazole (Table 2, entry 17).
